# Supplementary material for: Genome-Wide Analysis of Cell Type-Specific Gene Transcription during Spore Formation in Clostridium difficile
Source: PubMed Central journal article supplement (PMC3789822; doi:10.1371/journal.pgen.1003756), 2013-10-03
Supplement: pgen.1003756.s001.pdf [file pgen.1003756.s001.pdf]

**Figure S1. Aligement of the  $\sigma^E$  and  $\sigma^K$  proteins of *B. subtilis* and *C. difficile***

```

SigE-CD      MLRLKERIISFITMLGIKLIKIIKPKGIYYMGGANILPPPLKPEEEMELLOKLET--DESV
SigE-BS      MKKLLKLRLLTHLWYKLLMKLGL--KSDEVVYIIGGSEALPPPLSKDEEQVLLMKLPNG--DQAA
SigK-CD          MAALKSFEEKPLTPEEEEIEYLTQFKIENDKSA
SigK-BS      MVTGVFAALGFVVKE--LVFLVSYVKNNAPQPPLSSSEEKKYL--ELMAKGDEHA
                 *              : : **. **. * : : * : .

SigE-CD      KSILIERNLRVLVVIISRFKENTGIDVEDLISIGTIGLIKAVNTFKLNKNIKLATYASRCI
SigE-BS      RAILIERNLRVLVVIARKFENTGINIEDLISIGTIGLIKAVNTFNPEKIKLATYASRCI
SigK-CD      KDTLIERNMRLVAYIAKKYNSTEDQDDLISIGTIGLIKAIETYNDKGTRLATYASRCI
SigK-BS      RNMLIEHNLRVLAHIVKKFENTGEDAEDLISIGTIGLIKIESYSAGKGTKLATYAARCI
                 : ***:****.:* :****: : :*****.::::. * :*****:***

SigE-CD      ENEI-----LMYL
SigE-BS      ENEI-----LMYL
SigK-CD      ENEI-----LMNI
SigK-BS      ENEIVITKGGCIHPSLIRFNIYGVRIHNGNFFHDKVNNCFIFKSMPPPLFVMNNEILMHL
                 *****                               ** :

SigE-CD      RKNNKKKTEVSFDEPLNIDLGNELLLSDVLGTENDEIYKIEEEEIDRDLL--VMALDRLS
SigE-BS      RRNNKIRSEVSFDEPLNIDWDGNELLLSDVLGTDDDIITKDI EANVDKLL--KKALEQLN
SigK-CD      RSNKKNTQVSLQDPIGTDKEGNEISLLDILGTEANYVLDEVELKVQVQKLYEQLNKILT
SigK-BS      RALKKTKKDVS LDHDPIGDKEGNEISLDV LKSENEVDIT IQLNMELEKV--QYIDILD
                 * :* :.****.:.*. * :****: * ** * : : : . : : : : : . *

SigE-CD      DREKQIMELRFGLIDKGIETQKEVAGMLGISQSYISRLEKKIISRLOKEMKKFV-----
SigE-BS      EREKQIMELRFGLVGE--EKTQKDVADMMGISQSYISRLEKRIKRLRKEFNKMV-----
SigK-CD      PREREIVQLRYGLTPYG--YKTQREIAQKLDISRSYVSRIEKKALKKLEKELVQES-----
SigK-BS      DREKEVIVGRFGLDLKK--EKTQREIAKELGISRSYVSRIEKRALMKMFHEFYRAEKEKRR
                 **::::: *:**          *:***: * .***:***:***: : : : ** :

                               

SigE-CD      -----
SigE-BS      -----
SigK-CD      -----
SigK-BS      KAKGK

```
