# Supplementary material for: Genome-Wide Analysis of Cell Type-Specific Gene Transcription during Spore Formation in Clostridium difficile
Source: PubMed Central journal article supplement (PMC3789822; doi:10.1371/journal.pgen.1003756), 2013-10-03

**Figure S3. Aligement of the SpoIID regulator of several bacilli and clostridia.**

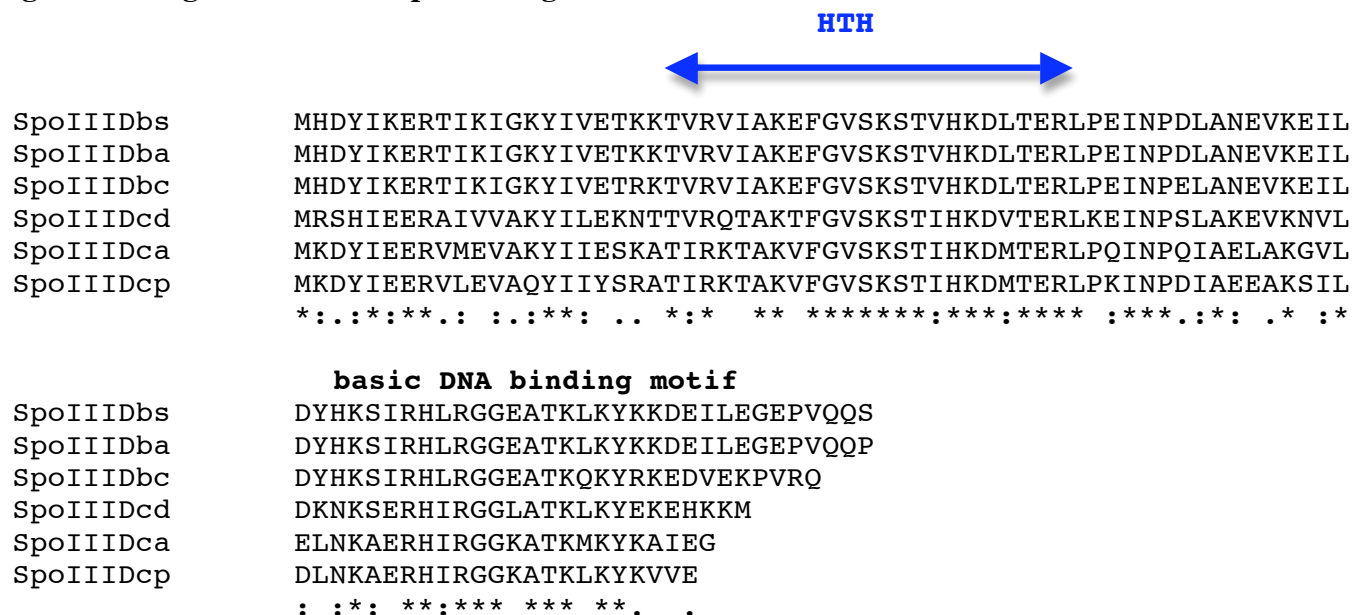

Supplement: pgen.1003756.s003.pdf [file pgen.1003756.s003.pdf]
