# Supplementary material for: Genome-Wide Analysis of Cell Type-Specific Gene Transcription during Spore Formation in Clostridium difficile
Source: PubMed Central journal article supplement (PMC3789822; doi:10.1371/journal.pgen.1003756), 2013-10-03
Supplement: pgen.1003756.s005.pdf [file pgen.1003756.s005.pdf]

**Table S1. List of genes controlled by  $\sigma^F$  in transcriptome**

| <b>Gene</b>        | <b>Function</b>                                                          | <b>Expression ratio<br/>in transcriptome<br/>sigF/630<math>\Delta</math>erm</b> |
|--------------------|--------------------------------------------------------------------------|---------------------------------------------------------------------------------|
| <b>Sporulation</b> |                                                                          |                                                                                 |
| CD0125             | <i>spoIIQ</i> Stage II sporulation protein Q                             | <b>0.11</b>                                                                     |
| CD2470             | <i>gpr</i> Spore endopeptidase                                           | <b>0.22</b>                                                                     |
| CD2469             | <i>spoIIP</i> Stage II sporulation protein P                             | <b>0.14</b>                                                                     |
| CD2468             | Conserved hypothetical protein                                           | <b>0.28</b>                                                                     |
| CD3564             | <i>spoIIR</i> Pro-SigE endopeptidase signalling protein                  | <b>0.43</b>                                                                     |
| CD3563             | <i>sleB</i> Spore-cortex-lytic protein                                   | <b>0.16</b>                                                                     |
| CD3499             | <i>spoVT</i> Stage V sporulation protein T                               | <b>0.07</b>                                                                     |
| CD0783             | <i>spoIVB'</i> Stage IV sporulation protein SpoIVB, S55 peptidase family | <b>0.10</b>                                                                     |
| CD0773             | <i>spoVAC</i> Stage V sporulation protein AC                             | <b>0.24</b>                                                                     |
| CD0774             | <i>spoVAD</i> Stage V sporulation protein AD                             | <b>0.27</b>                                                                     |
| CD0775             | <i>spoVAE</i> Stage V sporulation protein AE                             | <b>0.32</b>                                                                     |
| CD2688             | <i>sspA</i> Small, acid-soluble spore protein alpha                      | <b>0.00</b>                                                                     |
| CD3249             | <i>sspB</i> Small, acid-soluble spore protein alpha                      | <b>0.01</b>                                                                     |
| CD1290             | Putative small acid-soluble spore protein SASP                           | <b>0.29</b>                                                                     |
| CD3220.1           | Small acid-soluble spore protein                                         | <b>0.28</b>                                                                     |
| CD1230             | <i>sigK</i> Fragment of RNA polymerase sigma-K factor SigK (Part1)       | <b>0.47</b>                                                                     |
| CD1613             | <i>cotA</i> Spore outer coat layer protein CotA                          | <b>0.13</b>                                                                     |
| CD0598             | <i>cotCB</i> Spore-coat protein CotCB manganese catalase                 | <b>0.18</b>                                                                     |
| CD0214             | Conserved hypothetical protein                                           | <b>0.30</b>                                                                     |
| CD0213             | Putative spore coat protein                                              | <b>0.47</b>                                                                     |
| CD0332             | <i>bclA1</i> Putative exosporium glycoprotein                            | <b>0.43</b>                                                                     |
| CD3230             | <i>bclA2</i> Putative exosporium glycoprotein                            | <b>0.16</b>                                                                     |
| CD3349             | <i>bclA3</i> Exosporium glycoprotein BclA3                               | <b>0.12</b>                                                                     |
| <b>Stress</b>      |                                                                          |                                                                                 |
| CD1567             | putative manganese catalase                                              | <b>0.25</b>                                                                     |
| CD2845             | <i>rbr</i> Rubrerythrin                                                  | <b>0.14</b>                                                                     |
| CD1631             | <i>sodA</i> Superoxide dismutase (Mn)                                    | <b>0.06</b>                                                                     |
| CD3462             | <i>mazE</i> Putative antitoxin EndoAI                                    | <b>0.20</b>                                                                     |
| CD3461             | <i>mazF</i> Endoribonuclease toxin                                       | <b>0.31</b>                                                                     |
| <b>envelopes</b>   |                                                                          |                                                                                 |
| CD1430             | <i>pdaA</i> Putative $\delta$ -lactam-biosynthetic deacetylase           | <b>0.06</b>                                                                     |
| CD1291             | <i>dacF</i> D-alanyl-D-alanine carboxypeptidase                          | <b>0.11</b>                                                                     |
| CD2141             | Serine-type D-Ala-D-Ala carboxypeptidase                                 | <b>0.30</b>                                                                     |
| CD2184             | Putative N-acetylmuramoyl-L-alanine amidase                              | <b>0.39</b>                                                                     |
| CD3463             | <i>alr2</i> Alanine racemase 2                                           | <b>0.23</b>                                                                     |
| CD3464             | Conserved hypothetical protein                                           | <b>0.18</b>                                                                     |
| CD0784             | Putative N-acetylmuramoyl-L-alanine amidase                              | <b>0.23</b>                                                                     |
| CD1229             | Putative peptidoglycan glycosyltransferase                               | <b>0.42</b>                                                                     |
| CD2664             | <i>murE</i> UDP-N-acetylmuramyl-tripeptide synthetase                    | <b>0.51</b>                                                                     |
| CD2762             | <i>uppS</i> Putative undecaprenyl pyrophosphate synthetase               | <b>0.20</b>                                                                     |
| CD0514             | <i>cwpV</i> Cell surface protein                                         | <b>0.61</b>                                                                     |
| CD0792             | Putative membrane protein, DUF81 family                                  | <b>0.39</b>                                                                     |
| CD0793             | Putative membrane protein, DUF81 family                                  | <b>0.26</b>                                                                     |
| CD1297             | Putative membrane protein                                                | <b>0.31</b>                                                                     |
| CD1298             | Conserved hypothetical protein                                           | <b>0.19</b>                                                                     |
| CD1677             | Putative membrane protein                                                | <b>0.48</b>                                                                     |
| CD1940             | Putative membrane protein                                                | <b>0.25</b>                                                                     |
| CD2315             | Putative exported protein                                                | <b>0.31</b>                                                                     |
| CD2634             | Conserved hypothetical protein                                           | <b>0.27</b>                                                                     |
| CD2635             | Putative membrane protein                                                | <b>0.33</b>                                                                     |
| CD2636             | Putative membrane protein                                                | <b>0.20</b>                                                                     |
| CD2686             | Putative membrane protein                                                | <b>0.33</b>                                                                     |
| CD2856             | Putative membrane protein                                                | <b>0.46</b>                                                                     |
| CD3551.1           | Putative membrane protein                                                | <b>0.11</b>                                                                     |

|                                     |             |                                                               |             |
|-------------------------------------|-------------|---------------------------------------------------------------|-------------|
| CD1707                              |             | Putative C4-dicarboxylate anaerobic carrier, DcuC family      | <b>0.29</b> |
| CD2107                              |             | Xanthine/uracil/thiamine/ascorbate permease family protein    | <b>0.37</b> |
| CD1891                              |             | Fragment of ABC-type transport system, substrate-binding pr   | <b>0.40</b> |
| CD2102                              |             | Putative Na(+)/H(+) antiporter                                | <b>0.49</b> |
| CD2465                              |             | Putative amino acid/polyamine transporter                     | <b>0.36</b> |
| <b>metabolism</b>                   |             |                                                               |             |
| CD0684                              |             | Putative ATP-dependent peptidase, M41 family                  | <b>0.29</b> |
| CD1319                              |             | Putative polysaccharide deacetylase                           | <b>0.37</b> |
| CD0580                              | <i>gapN</i> | Glyceraldehyde-3-phosphate dehydrogenase (NADP(+)) (GAP)      | <b>0.36</b> |
| CD1543                              |             | putative FMN-dependent NADH-azoreductase                      | <b>0.16</b> |
| CD2431                              |             | Putative nitrite/sulphite reductase                           | <b>0.23</b> |
| CD2661                              |             | Putative peptidase, M16 family                                | <b>0.47</b> |
| CD2660                              |             | Putative peptidase, M16 family                                | <b>0.48</b> |
| CD0047                              | <i>ispD</i> | 2-C-methyl-D-erythritol 4-phosphate cytidyltransferase        | <b>0.48</b> |
| CD0048                              | <i>ispF</i> | 2-C-methyl-D-erythritol 2,4-cyclodiphosphate synthase         | <b>0.50</b> |
| CD3595                              |             | Aminopeptidase                                                | <b>0.55</b> |
| CD1707                              |             | Putative C4-dicarboxylate anaerobic carrier, DcuC family      | <b>0.29</b> |
| CD3521                              |             | Putative peptidase T, M20B family                             | <b>0.38</b> |
| CD2537                              |             | Membrane-associated 5'-nucleotidase/phosphoesterase           | <b>0.42</b> |
| CD0649                              |             | Putative peptidase, S9 family                                 | <b>3.80</b> |
| CD0650                              |             | Putative peptidase, S9 family                                 | <b>5.21</b> |
| CD0651                              |             | Putative permease                                             | <b>4.65</b> |
| CD1599                              | <i>thiD</i> | Phosphomethylpyrimidine kinase                                | <b>2.36</b> |
| CD1600                              | <i>thiM</i> | Hydroxyethylthiazole kinase                                   | <b>2.23</b> |
| CD1601                              | <i>thiE</i> | Thiamine-phosphate pyrophosphorylase                          | <b>1.83</b> |
| CD1700                              | <i>ribD</i> | Riboflavin biosynthesis protein ribD [Includes: Diaminohydro] | <b>3.74</b> |
| CD1699                              | <i>ribE</i> | Riboflavin synthase alpha subunit                             | <b>2.31</b> |
| CD1908                              | <i>eutS</i> | Ethanolamine carboxysome structural protein                   | <b>3.60</b> |
| CD1909                              | <i>eutP</i> | Ethanolamine utilization protein                              | <b>2.69</b> |
| CD1910                              | <i>eutV</i> | Two-component response regulator, Ethanolamine specific       | <b>2.22</b> |
| CD1911                              | <i>eutW</i> | Two-component sensor histidine kinase, Ethanolamine specifi   | <b>2.15</b> |
| CD0108                              | <i>nrdD</i> | Anaerobic ribonucleoside triphosphate reductase               | <b>1.95</b> |
| CD0109                              | <i>nrdG</i> | Anaerobic ribonucleoside-triphosphate reductase-activating p  | <b>1.77</b> |
| <b>miscellaneous</b>                |             |                                                               |             |
| CD1486                              |             | Putative ribosome recycling factor                            | <b>0.10</b> |
| CD0761                              |             | Putative ATP-dependent RNA helicase                           | <b>0.46</b> |
| CD3220                              |             | Putative methyltransferase                                    | <b>0.39</b> |
| CD1323                              | <i>tepA</i> | Protein export-enhancing factor                               | <b>0.38</b> |
| <b>regulators</b>                   |             |                                                               |             |
| CD0648                              |             | Transcriptional regulator, GntR family                        | <b>2.79</b> |
| CD2928                              |             | Conserved hypothetical protein                                | <b>2.15</b> |
| CD2927                              |             | Transcriptional regulator, Phage-type                         | <b>2.33</b> |
| <b>Proteins of unknown function</b> |             |                                                               |             |
| CD0311                              |             | Conserved hypothetical protein                                | <b>0.32</b> |
| CD0347                              |             | Conserved hypothetical protein                                | <b>0.35</b> |
| CD0348                              |             | Fragment of conserved hypothetical protein (Part 2)           | <b>0.35</b> |
| CD0543                              |             | Conserved hypothetical protein                                | <b>0.38</b> |
| CD0896                              |             | Conserved hypothetical protein                                | <b>0.21</b> |
| CD1067                              |             | Conserved hypothetical protein                                | <b>0.07</b> |
| CD1301.1                            |             | Conserved hypothetical protein                                | <b>0.28</b> |
| CD1354                              |             | Conserved hypothetical protein                                | <b>0.22</b> |
| CD1463                              |             | Conserved hypothetical protein                                | <b>0.06</b> |
| CD1581                              |             | Conserved hypothetical protein                                | <b>0.03</b> |
| CD1880                              |             | Conserved hypothetical protein                                | <b>0.07</b> |
| CD2112                              |             | Conserved hypothetical protein                                | <b>0.03</b> |
| CD2245.1                            |             | Conserved hypothetical protein                                | <b>0.10</b> |
| CD2375                              |             | Conserved hypothetical protein                                | <b>0.14</b> |
| CD2687                              |             | Conserved hypothetical protein                                | <b>0.36</b> |
| CD2808                              |             | Conserved hypothetical protein                                | <b>0.05</b> |

|        |                                                |             |
|--------|------------------------------------------------|-------------|
| CD2809 | Conserved hypothetical protein, DUF1540 family | <b>0.05</b> |
| CD2816 | Conserved hypothetical protein                 | <b>0.43</b> |
| CD3620 | Conserved hypothetical protein                 | <b>0.35</b> |
| CD3271 | Conserved hypothetical protein                 | <b>2.11</b> |
| CD2067 | Conserved hypothetical protein                 | <b>2.05</b> |

A gene is considered differentially expressed between the 630 $\Delta$ erm strain and the *sigF* mutant when the P value is <0.05 using the statistical analysis described in Materials and Methods. We did not include genes with a fold-change < 2-fold. However, some genes with a fold-change less than 2-fold were included when they appeared to be in the same transcription units with regulated genes for which the fold-change was  $\geq 2$  or when they were regulated by other sigma factors of sporulation.
