# Supplementary material for: Genome-Wide Analysis of Cell Type-Specific Gene Transcription during Spore Formation in Clostridium difficile
Source: PubMed Central journal article supplement (PMC3789822; doi:10.1371/journal.pgen.1003756), 2013-10-03
Supplement: pgen.1003756.s006.pdf [file pgen.1003756.s006.pdf]

**Table S2. List of genes controlled by  $\sigma^E$  in transcriptome**

| <b>Gene</b>        | <b>Function</b>                                                                | <b>Expression ratio<br/>in transcriptome<br/>sigE/630<math>\Delta</math>erm</b> |
|--------------------|--------------------------------------------------------------------------------|---------------------------------------------------------------------------------|
| <b>Sporulation</b> |                                                                                |                                                                                 |
| CD0124             | <i>spoIID</i> peptidoglycane hydrolase SpoIID                                  | 0.24                                                                            |
| CD1192             | <i>spoIIIAA</i> ATP-binding stage III sporulation protein                      | 0.05                                                                            |
| CD1193             | <i>spoIIIB</i> Stage III sporulation protein AB                                | 0.05                                                                            |
| CD1194             | <i>spoIIIC</i> Stage III sporulation protein AC                                | 0.03                                                                            |
| CD1195             | <i>spoIIID</i> Stage III sporulation protein AD                                | 0.07                                                                            |
| CD1196             | <i>spoIIIE</i> Stage III sporulation protein AE                                | 0.09                                                                            |
| CD1197             | <i>spoIIIF</i> Stage III sporulation protein AF                                | 0.08                                                                            |
| CD1198             | <i>spoIIIG</i> Stage III sporulation protein AG                                | 0.02                                                                            |
| CD1199             | <i>spoIIIAH</i> Stage III sporulation ratchet engulfment protein               | 0.05                                                                            |
| CD0126             | <i>spoIIID</i> Transcriptional regulator SpoIIID                               | 0.04                                                                            |
| CD2629             | <i>spoIVA</i> Stage IV sporulation protein A                                   | 0.02                                                                            |
| CD0783             | <i>spoIVB</i> Stage IV sporulation protein SpoIVB, S55 peptidase family        | 0.12                                                                            |
| CD3567             | <i>sipl</i> Functional homolog to SpoIVD                                       | 0.05                                                                            |
| CD2442             | <i>spoIV</i> Stage IV sporulation protein YqfD-like                            | 0.14                                                                            |
| CD2443             | Conserved hypothetical protein YqfC-like                                       | 0.05                                                                            |
| CD2967             | <i>spoVFB</i> Dipicolinate synthase subunit B                                  | 0.29                                                                            |
| CD2968             | <i>dpaA</i> Dipicolinate synthase subunit A                                    | 0.30                                                                            |
| CD1230             | <i>sigK</i> Fragment of RNA polymerase sigma-K factor SigK (Part1)             | 0.13                                                                            |
| CD0782             | Putative sporulation protein YunB                                              | 0.32                                                                            |
| CD1168             | Putative membrane protein, BDBH YIbJ involved in spore cortex formation        | 0.18                                                                            |
| CD1613             | <i>cotA</i> Spore outer coat layer protein CotA                                | 0.10                                                                            |
| CD1511             | <i>cotB</i> Spore outer coat layer protein CotB                                | 0.05                                                                            |
| CD0598             | <i>cotCB</i> Spore-coat protein CotCB manganese catalase                       | 0.18                                                                            |
| CD2399             | Conserved hypothetical protein                                                 | 0.14                                                                            |
| CD2400             | <i>cotJB2</i> Spore coat peptide assembly protein CotJB 2                      | 0.10                                                                            |
| CD2401             | <i>cotD</i> Spore coat protein CotD manganese catalase                         | 0.11                                                                            |
| CD1433             | <i>cotE</i> Spore coat protein CotE peroxiredoxin/chitinase                    | 0.14                                                                            |
| CD0213             | Putative spore coat protein                                                    | 0.42                                                                            |
| CD0214             | Conserved hypothetical protein                                                 | 0.23                                                                            |
| CD0551             | <i>sleC</i> Spore cortex-lytic enzyme pre-pro-form                             | 0.15                                                                            |
| CD0332             | <i>bclA1</i> Putative exosporium glycoprotein                                  | 0.21                                                                            |
| CD3230             | <i>bclA2</i> Putative exosporium glycoprotein                                  | 0.12                                                                            |
| CD3349             | <i>bclA3</i> Exosporium glycoprotein BclA3                                     | 0.01                                                                            |
| CD3542             | <i>spmA</i> Spore maturation protein A                                         | 0.16                                                                            |
| CD3541             | <i>spmB</i> Spore maturation protein B                                         | 0.11                                                                            |
| CD0106             | <i>cwlD</i> Germination-specific N-acetylmuramoyl-L-alanine amidase, Autolysin | 0.14                                                                            |
| CD2246             | <i>cspC</i> Subtilisin-like serine germination related protease                | 0.16                                                                            |
| CD2247             | <i>cspBA</i> Subtilisin-like serine germination related protease               | 0.11                                                                            |
| CD3249             | <i>sspB</i> Small, acid-soluble spore protein alpha                            | 0.04                                                                            |
| CD1320             | Putative peptidase, M16 family                                                 | 0.25                                                                            |
| CD1321             | Putative sporulation protein                                                   | 0.23                                                                            |
| CD1322             | <i>dapG</i> Aspartokinase 1                                                    | 0.32                                                                            |
| CD1068             | Putative polysaccharide biosynthesis/sporulation protein                       | 0.23                                                                            |
| CD2639             | Putative cytotoxic factor                                                      | 0.21                                                                            |
| CD2640             | <i>nrdR</i> Transcriptional regulator, repressor NrdR family                   | 0.23                                                                            |
| CD2641             | Putative sporulation protein                                                   | 0.13                                                                            |
| CD2439             | Putative diacylglycerol kinase/undecaprenol kinase                             | 0.45                                                                            |
| CD3455             | Putative carboxy-terminal protease, homolog of CtpB                            | 0.25                                                                            |
| CD3493             | Putative membrane protein                                                      | 0.18                                                                            |
| CD3494             | Putative spore protein                                                         | 0.20                                                                            |
| CD1234             | Putative phage protein, skin element                                           | 0.22                                                                            |
| <b>stress</b>      |                                                                                |                                                                                 |
| CD1631             | <i>sodA</i> Superoxide dismutase (Mn)                                          | 0.21                                                                            |
| CD3461             | <i>mazF</i> Endoribonuclease toxin                                             | 0.11                                                                            |
| CD3462             | <i>mazE</i> Putative antitoxin EndoAI                                          | 0.05                                                                            |
| CD2865             | Putative bacterioferritin                                                      | 0.19                                                                            |
| <b>envelopes</b>   |                                                                                |                                                                                 |
| CD2664             | <i>murE</i> UDP-N-acetylmuramyl-tripeptide synthetase                          | 0.45                                                                            |
| CD3463             | <i>alr2</i> Alanine racemase 2                                                 | 0.05                                                                            |
| CD3464             | Conserved hypothetical protein                                                 | 0.04                                                                            |
| CD2761             | Putative N-acetylmuramoyl-L-alanine amidase                                    | 0.40                                                                            |
| CD3007             | Putative L,D-transpeptidases                                                   | 0.37                                                                            |

|                                     |                                                                               |      |
|-------------------------------------|-------------------------------------------------------------------------------|------|
| CD2184                              | N-acetylmuramoyl-L-alanine amidase                                            | 0.21 |
| CD2761                              | Putative N-acetylmuramoyl-L-alanine amidase                                   | 0.40 |
| CD0514                              | <i>cwpV</i> Cell surface protein                                              | 0.63 |
| CD2445                              | Putative transmembrane signaling protein, TspO/MBR family                     | 0.07 |
| CD1845                              | Putative membrane protein Tn1549-like, CTn5-Orf1                              | 0.14 |
| CD1928                              | Putative membrane protein                                                     | 0.14 |
| CD1929                              | Putative membrane protein                                                     | 0.27 |
| CD2800                              | Putative membrane protein                                                     | 0.11 |
| CD1416                              | Putative membrane protein                                                     | 0.20 |
| CD0314                              | Putative membrane protein                                                     | 0.15 |
| CD1940                              | Putative membrane protein                                                     | 0.08 |
| CD3551.1                            | Putative membrane protein                                                     | 0.31 |
| CD0131                              | Putative membrane protein                                                     | 0.18 |
| CD1301                              | Putative membrane protein                                                     | 0.33 |
| CD2144                              | Putative membrane protein                                                     | 0.46 |
| CD2465                              | Putative amino acid/polyamine transporter                                     | 0.20 |
| CD0902                              | Putative cation efflux protein                                                | 0.29 |
| CD2833                              | Putative calcium-transporting ATPase                                          | 0.22 |
| CD0760                              | Putative Ca <sup>2+</sup> /Na <sup>+</sup> antiporter                         | 0.20 |
| CD3483                              | Putative zinc/iron permease                                                   | 0.34 |
| <b>metabolism</b>                   |                                                                               |      |
| CD3635                              | Conserved hypothetical protein                                                | 0.29 |
| CD3636                              | Putative membrane protein                                                     | 0.42 |
| CD3637                              | Putative NADPH-dependent FMN reductase                                        | 0.27 |
| CD3638                              | Conserved hypothetical protein                                                | 0.21 |
| CD3251                              | Putative dehydrogenase                                                        | 0.25 |
| CD3258                              | Iron hydrogenase                                                              | 0.08 |
| CD2428                              | Putative flavodoxin/ferredoxin oxidoreductase beta subunit                    | 0.38 |
| CD2429                              | Putative flavodoxin/ferredoxin oxidoreductase alpha subunit                   | 0.31 |
| CD2429.1                            | Putative 4Fe-4S ferredoxin, iron-sulfur binding domain protein, delta subunit | 0.27 |
| CD2000                              | <i>isp</i> Intracellular serine protease                                      | 0.18 |
| CD3652                              | Putative peptidase, M1 family                                                 | 0.12 |
| CD1085                              | Putative membrane protein                                                     | 0.26 |
| CD1086                              | Putative peptidase, M20D family                                               | 0.26 |
| CD3521                              | Putative peptidase T, M20B family                                             | 0.33 |
| CD1746                              | <i>gltC</i> Sodium/glutamate symporter                                        | 0.20 |
| CD1555                              | Putative amino acid permease                                                  | 0.22 |
| CD1259                              | <i>brnQ-1</i> Branched chain amino acid transport system carrier protein      | 0.39 |
| CD1904                              | ABC-type transport system, permease                                           | 0.26 |
| CD1891                              | Fragment of ABC-type transport system, substrate-binding protein (Part 1)     | 0.26 |
| CD1927                              | <i>ytIC</i> putative ABC transporter component, ATP-binding                   | 0.30 |
| CD1319                              | Putative polysaccharide deacetylase                                           | 0.06 |
| CD3248                              | Polysaccharide deacetylase                                                    | 0.09 |
| CD3257                              | Putative polysaccharide deacetylase                                           | 0.11 |
| CD3032                              | Putative pyridoxal phosphate-dependent transferase                            | 0.32 |
| CD0982                              | <i>ubiA</i> Putative UbiA prenyltransferase                                   | 0.39 |
| CD2537                              | Putative membrane-associated 5'-nucleotidase/phosphoesterase                  | 0.15 |
| <b>miscellaneous</b>                |                                                                               |      |
| CD0749                              | Putative DNA helicase, UvrD/REP type                                          | 0.32 |
| CD3235                              | <i>ssb</i> Single-stranded DNA-binding protein                                | 0.03 |
| CD1167                              | <i>recV</i> Tyrosine DNA recombinase, XerC/XerD family                        | 0.26 |
| CD1846                              | Putative conjugative transposon protein Tn1549-like, CTn5-Orf2                | 0.15 |
| CD2864                              | Putative hydrolase                                                            | 0.08 |
| CD3298                              | Putative ATP/GTP-binding protein                                              | 0.19 |
| CD1486                              | Putative ribosome recycling factor                                            | 0.26 |
| <b>regulator</b>                    |                                                                               |      |
| CD0757                              | Putative diguanylate kinase signaling protein                                 | 0.45 |
| CD1616                              | Putative diguanylate kinase signaling protein                                 | 0.37 |
| CD2637                              | Two-component sensor histidine kinase                                         | 0.30 |
| <b>Proteins of unknown function</b> |                                                                               |      |
| CD0129                              | Conserved hypothetical protein, DUF1256 family                                | 0.15 |
| CD0196                              | Fragment of conserved hypothetical protein, DUF111 family (part 2)            | 0.18 |
| CD0311                              | Conserved hypothetical protein                                                | 0.02 |
| CD0896                              | Conserved hypothetical protein                                                | 0.05 |
| CD1063                              | Conserved hypothetical protein                                                | 0.11 |
| CD1063.2                            | Conserved hypothetical protein                                                | 0.01 |
| CD1063.3                            | Conserved hypothetical protein                                                | 0.01 |

|          |                                                 |             |
|----------|-------------------------------------------------|-------------|
| CD1063.1 | Conserved hypothetical protein                  | <b>0.17</b> |
| CD1065   | Conserved hypothetical protein                  | <b>0.06</b> |
| CD1066   | Conserved hypothetical protein                  | <b>0.16</b> |
| CD1067   | Conserved hypothetical protein                  | <b>0.00</b> |
| CD1133   | Conserved hypothetical protein                  | <b>0.12</b> |
| CD1581   | Conserved hypothetical protein                  | <b>0.01</b> |
| CD1726   | Conserved hypothetical protein                  | <b>0.05</b> |
| CD1880   | Conserved hypothetical protein                  | <b>0.21</b> |
| CD1884   | Conserved hypothetical protein                  | <b>0.11</b> |
| CD1930   | Conserved hypothetical protein                  | <b>0.27</b> |
| CD2121   | Conserved hypothetical protein                  | <b>0.23</b> |
| CD2374   | Conserved hypothetical protein                  | <b>0.23</b> |
| CD2816   | Conserved hypothetical protein                  | <b>0.11</b> |
| CD3234   | Conserved hypothetical protein                  | <b>0.09</b> |
| CD3457   | Conserved hypothetical protein                  | <b>0.05</b> |
| CD3465   | Conserved hypothetical protein                  | <b>0.40</b> |
| CD3522   | Conserved hypothetical protein                  | <b>0.09</b> |
| CD3580   | Conserved hypothetical protein                  | <b>0.11</b> |
| CD3620   | Conserved hypothetical protein, similar to YmaF | <b>0.34</b> |

A gene is considered differentially expressed between the 630 $\Delta$ erm strain and the *sigE* mutant when the *P* value is <0.05 using the statistical analysis described in Materials and Methods. We did not include genes with a fold-change < 2-fold. However, some genes with a fold-change less than 2-fold were included when they appeared to be in the same transcription units with regulated genes for which the fold-change was  $\geq 2$  or when they were regulated by other sigma factors of sporulation.
