# Supplementary material for: Genome-Wide Analysis of Cell Type-Specific Gene Transcription during Spore Formation in Clostridium difficile
Source: PubMed Central journal article supplement (PMC3789822; doi:10.1371/journal.pgen.1003756), 2013-10-03
Supplement: pgen.1003756.s007.pdf [file pgen.1003756.s007.pdf]

**Table S3. List of genes controlled by  $\sigma$ G in transcriptome**

| Gene                                | Function                                                           | Expression ratio<br>in transcriptome<br>sigG/630 $\Delta$ erm |
|-------------------------------------|--------------------------------------------------------------------|---------------------------------------------------------------|
| <b>Sporulation</b>                  |                                                                    |                                                               |
| CD2642                              | <i>sigG</i> RNA polymerase sigma-G factor                          | 0.23                                                          |
| CD0773                              | <i>spoVAC</i> Stage V sporulation protein AC                       | 0.26                                                          |
| CD0774                              | <i>spoVAD</i> Stage V sporulation protein AD                       | 0.30                                                          |
| CD0775                              | <i>spoVAE</i> Stage V sporulation protein AE                       | 0.28                                                          |
| CD1213                              | <i>spoIVB</i> Stage IV sporulation protein B, peptidase S55 family | 0.60                                                          |
| CD3499                              | <i>spoVT</i> Stage V sporulation protein T                         | 0.22                                                          |
| CD3249                              | <i>sspB</i> Small, acid-soluble spore protein alpha                | 0.07                                                          |
| CD2688                              | <i>sspA</i> Small, acid-soluble spore protein alpha                | 0.02                                                          |
| CD1290                              | Putative small acid-soluble spore protein SASP                     | 0.52                                                          |
| CD3220.1                            | Small acid-soluble spore protein                                   | 0.66                                                          |
| <b>Stress</b>                       |                                                                    |                                                               |
| CD2845                              | <i>rbr</i> Rubrerythrin                                            | 0.27                                                          |
| CD1631                              | <i>sodA</i> Superoxide dismutase (Mn)                              | 0.32                                                          |
| CD1567                              | putative manganese catalase                                        | 0.27                                                          |
| <b>Enveloppes</b>                   |                                                                    |                                                               |
| CD0784                              | Putative N-acetylmuramoyl-L-alanine amidase                        | 0.41                                                          |
| CD1291                              | <i>dacF</i> D-alanyl-D-alanine carboxypeptidase                    | 0.31                                                          |
| CD2762                              | <i>uppS</i> Putative undecaprenyl pyrophosphate synthetase         | 0.62                                                          |
| CD1430                              | Putative $\delta$ -lactam-biosynthetic de-N-acteylase              | 0.21                                                          |
| CD0792                              | Putative membrane protein, DUF81 family                            | 0.43                                                          |
| CD0793                              | Putative membrane protein, DUF81 family                            | 0.33                                                          |
| CD1788                              | Conserved hypothetical protein                                     | 0.43                                                          |
| CD1789                              | Putative membrane protein, DUF421 family                           | 0.61                                                          |
| CD2051                              | Putative membrane protein                                          | 0.52                                                          |
| CD2315                              | Putative exported protein                                          | 0.38                                                          |
| CD2634                              | Conserved hypothetical protein                                     | 0.65                                                          |
| CD2635                              | Putative membrane protein                                          | 0.50                                                          |
| CD2636                              | Putative membrane protein                                          | 0.34                                                          |
| CD3551.1                            | Putative membrane protein                                          | 0.18                                                          |
| CD2465                              | Putative amino acid/polyamine transporter                          | 0.52                                                          |
| <b>Metabolism</b>                   |                                                                    |                                                               |
| CD0684                              | Putative ATP-dependent peptidase, M41 family                       | 0.46                                                          |
| CD3489                              | Putative oligoendopeptidase F, peptidase M3B family                | 0.62                                                          |
| CD2431                              | Putative nitrite/sulphite reductase                                | 0.54                                                          |
| CD1676                              | <i>pcp</i> Pyrrolidone-carboxylate peptidase                       | 0.66                                                          |
| CD1677                              | Putative membrane protein                                          | 0.51                                                          |
| CD2841                              | Putative amidohydrolase                                            | 0.57                                                          |
| CD1543                              | putative FMN-dependent NADH-azoreductase                           | 0.43                                                          |
| CD1707                              | Putative C4-dicarboxylate anaerobic carrier, DcuC family           | 0.53                                                          |
| <b>Translation</b>                  |                                                                    |                                                               |
| CD1486                              | Putative ribosome recycling factor                                 | 0.17                                                          |
| <b>Proteins of unknown function</b> |                                                                    |                                                               |
| CD0543                              | Conserved hypothetical protein                                     | 0.57                                                          |
| CD1297                              | Conserved hypothetical protein                                     | 0.66                                                          |
| CD1298                              | Conserved hypothetical protein                                     | 0.55                                                          |
| CD1301.1                            | Conserved hypothetical protein                                     | 0.45                                                          |
| CD1354                              | Conserved hypothetical protein                                     | 0.48                                                          |
| CD1463                              | Conserved hypothetical protein                                     | 0.22                                                          |
| CD1568                              | Conserved hypothetical protein                                     | 0.60                                                          |
| CD1880                              | Conserved hypothetical protein                                     | 0.25                                                          |
| CD2112                              | Conserved hypothetical protein                                     | 0.26                                                          |
| CD2245.1                            | Conserved hypothetical protein                                     | 0.30                                                          |
| CD2375                              | Conserved hypothetical protein                                     | 0.24                                                          |
| CD2808                              | Conserved hypothetical protein                                     | 0.64                                                          |

|        |                                               |             |
|--------|-----------------------------------------------|-------------|
| CD2809 | Conserved hypotheticalprotein, DUF1540 family | <b>0.45</b> |
| CD3610 | Conserved hypothetical protein                | <b>0.66</b> |

A gene is considered differentially expressed between the 630 $\Delta$ erm strain and the *sigG* mutant when the P value is <0.05 using the statistical analysis described in Materials and Methods.
