# Supplementary material for: Genome-Wide Analysis of Cell Type-Specific Gene Transcription during Spore Formation in Clostridium difficile
Source: PubMed Central journal article supplement (PMC3789822; doi:10.1371/journal.pgen.1003756), 2013-10-03
Supplement: pgen.1003756.s008.pdf [file pgen.1003756.s008.pdf]

**Table S4. List of genes controlled by  $\sigma$ K in transcriptome**

| <b>Gene</b>                         | <b>Function</b>                                                   | <b>Expression ratio<br/>in transcriptome<br/>sigK/630Aerm</b> |
|-------------------------------------|-------------------------------------------------------------------|---------------------------------------------------------------|
| <b>Sporulation</b>                  |                                                                   |                                                               |
| CD1230                              | Fragment of RNA polymerase sigma-K factor SigK (Part1)            | <b>0.05</b>                                                   |
| CD3569                              | Sporulation-specific protease, YabG-like protein                  | <b>0.22</b>                                                   |
| CD1613                              | <i>cotA</i> Spore outer coat layer protein CotA                   | <b>0.05</b>                                                   |
| CD2399                              | Conserved hypothetical protein                                    | <b>0.01</b>                                                   |
| CD2400                              | <i>cotJB2</i> Spore coat peptide assembly protein CotJB 2         | <b>0.01</b>                                                   |
| CD2401                              | <i>cotD</i> Spore coat protein CotD manganese catalase            | <b>0.01</b>                                                   |
| CD0596                              | Conserved hypothetical protein                                    | <b>0.02</b>                                                   |
| CD0597                              | <i>cotJB1</i> Spore coat peptide assembly protein                 | <b>0.02</b>                                                   |
| CD0598                              | <i>cotCB</i> Spore-coat protein CotCB manganese catalase          | <b>0.01</b>                                                   |
| CD1433                              | <i>cotE</i> Spore coat protein CotE peroxiredoxin/chitinase       | <b>0.03</b>                                                   |
| CD2968                              | <i>dpaA</i> Dipicolinate synthase subunit A                       | <b>0.08</b>                                                   |
| CD2967                              | <i>spoVFB</i> Dipicolinate synthase subunit B                     | <b>0.09</b>                                                   |
| CD0551                              | <i>sleC</i> Spore cortex-lytic enzyme pre-pro-form                | <b>0.14</b>                                                   |
| CD0332                              | <i>bclA1</i> Putative exosporium glycoprotein                     | <b>0.08</b>                                                   |
| CD3230                              | <i>bclA2</i> Putative exosporium glycoprotein                     | <b>0.04</b>                                                   |
| CD3349                              | <i>bclA3</i> Exosporium glycoprotein BclA3                        | <b>0.02</b>                                                   |
| <b>Enveloppes</b>                   |                                                                   |                                                               |
| CD0514                              | <i>cwpV</i> Cell surface protein                                  | <b>0.20</b>                                                   |
| CD1898                              | Cell wall hydrolase, N-acetylmuramic acid L-alanine amidase       | <b>0.12</b>                                                   |
| CD1897                              | Conserved hypothetical protein                                    | <b>0.13</b>                                                   |
| CD2184                              | Putative N-acetylmuramoyl-L-alanine amidase (cell wall hydrolase) | <b>0.13</b>                                                   |
| CD2664                              | <i>murE</i> UDP-N-acetylmuramyl-tripeptide synthetase             | <b>0.42</b>                                                   |
| CD3007                              | Putative L,D-transpeptidases                                      | <b>0.48</b>                                                   |
| CD2537                              | Putative membrane-associated 5'-nucleotidase/phosphoesterase      | <b>0.22</b>                                                   |
| CD2458                              | Transporter, Major Facilitator Superfamily (MFS)                  | <b>0.39</b>                                                   |
| CD2459                              | Putative glucokinase, ROK family                                  | <b>0.41</b>                                                   |
| CD0902                              | Putative cation efflux protein                                    | <b>0.17</b>                                                   |
| CD1517                              | <i>feoB</i> Ferrous iron transport protein B                      | <b>0.05</b>                                                   |
| CD1518                              | <i>feoA</i> Ferrous iron transport protein                        | <b>0.05</b>                                                   |
| CD1904                              | ABC-type transport system, permease                               | <b>0.13</b>                                                   |
| CD2720                              | Putative transporter                                              | <b>0.16</b>                                                   |
| CD1927                              | <i>ytIC</i> Fragment of ABC transporter component, ATP-binding    | <b>0.08</b>                                                   |
| CD1891                              | Fragment of ABC-type transport system, substrate-binding protein  | <b>0.08</b>                                                   |
| CD2346                              | Putative membrane protein                                         | <b>0.24</b>                                                   |
| CD2144                              | Putative membrane protein                                         | <b>0.12</b>                                                   |
| CD1824                              | P-type calcium transport ATPase                                   | <b>2.69</b>                                                   |
| CD0147                              | Putative transporter                                              | <b>2.25</b>                                                   |
| <b>Metabolism</b>                   |                                                                   |                                                               |
| CD3350                              | Putative glycosyl transferase, family 2                           | <b>0.09</b>                                                   |
| CD3032                              | Putative pyridoxal phosphate-dependent transferase                | <b>0.11</b>                                                   |
| CD1951                              | putative Acyl-CoA N-acyltransferase                               | <b>0.19</b>                                                   |
| CD0119                              | <i>glmM</i> Phosphoglucosamine mutase                             | <b>0.49</b>                                                   |
| CD0120                              | <i>glmS</i> Glucosamine--fructose-6-phosphate aminotransferase    | <b>0.52</b>                                                   |
| CD0995                              | <i>serA</i> Putative D-3-phosphoglycerate dehydrogenase           | <b>6.49</b>                                                   |
| CD0996                              | Conserved hypothetical protein                                    | <b>3.08</b>                                                   |
| CD2480                              | Putative hydrolase                                                | <b>2.03</b>                                                   |
| <b>Miscellaenous</b>                |                                                                   |                                                               |
| CD0749                              | Putative DNA helicase, UvrD/REP type                              | <b>0.05</b>                                                   |
| CD1845                              | Putative membrane protein Tn1549-like, CTn5-Orf1                  | <b>0.17</b>                                                   |
| CD1846                              | Putative conjugative transposon protein Tn1549-like, CTn5-Orf2    | <b>0.20</b>                                                   |
| CD0564                              | putative ATP-dependent protease, Lon family                       | <b>0.39</b>                                                   |
| CD0309                              | Putative hydrolase, HAD superfamily, subfamily IB                 | <b>0.38</b>                                                   |
| <b>Regulator</b>                    |                                                                   |                                                               |
| CD2048                              | Transcriptional regulator, RpiR family                            | <b>2.05</b>                                                   |
| <b>Proteins of unknown function</b> |                                                                   |                                                               |
| CD0196                              | Fragment of conserved hypothetical protein, DUF111 family (part 2 | <b>0.18</b>                                                   |
| CD0896                              | Conserved hypothetical protein                                    | <b>0.02</b>                                                   |
| CD1063.1                            | Conserved hypothetical protein                                    | <b>0.21</b>                                                   |
| CD1063.2                            | Conserved hypothetical protein                                    | <b>0.04</b>                                                   |
| CD1063.3                            | Conserved hypothetical protein                                    | <b>0.04</b>                                                   |
| CD1065                              | Conserved hypothetical protein                                    | <b>0.30</b>                                                   |
| CD1067                              | Conserved hypothetical protein                                    | <b>0.03</b>                                                   |

|          |                                |             |
|----------|--------------------------------|-------------|
| CD1133   | Conserved hypothetical protein | <b>0.16</b> |
| CD1581   | Conserved hypothetical protein | <b>0.01</b> |
| CD2055   | Conserved hypothetical protein | <b>0.33</b> |
| CD2409   | Conserved hypothetical protein | <b>0.11</b> |
| CD3580   | Conserved hypothetical protein | <b>0.12</b> |
| CD3613   | Conserved hypothetical protein | <b>0.04</b> |
| CD3620   | Conserved hypothetical protein | <b>0.04</b> |
| CD1286   | Conserved hypothetical protein | <b>2.17</b> |
| CD1831.1 | Conserved hypothetical protein | <b>2.36</b> |

A gene is considered differentially expressed between the 630 $\Delta$ erm strain and the *sigK* mutant when the *P* value is <0.05 using the statistical analysis described in Materials and Methods. We did not insert in this list genes with a fold-change < 2-fold. However, some genes had a fold-change less than 2-fold but were included because they appeared to be in the same transcription units with regulated genes for which the fold-change was  $\geq 2$  or because they were regulated by other sigma factors of sporulation.
