# Supplementary material for: Genome-Wide Analysis of Cell Type-Specific Gene Transcription during Spore Formation in Clostridium difficile
Source: PubMed Central journal article supplement (PMC3789822; doi:10.1371/journal.pgen.1003756), 2013-10-03
Supplement: pgen.1003756.s010.pdf [file pgen.1003756.s010.pdf]

**Table S6. Identification of promoters recognized by  $\sigma^F$  and  $\sigma^G$**

| gene                                | sense         | TSS position | score | promoter sequences                          |
|-------------------------------------|---------------|--------------|-------|---------------------------------------------|
| <b>SigF-dependent promoters</b>     |               |              |       |                                             |
| <u>CD0125</u>                       | <i>spoIIQ</i> | 1 170627     | 19    | TAATTGTATAAAATGCCAAAAACACGTCAATAATCCAATG    |
| <u>CD0347</u>                       |               | 1 422797     | 6.3   | TTCACGATTAATAAACATAA-ATTGGTAAACTATAAGATA    |
| <u>CD0580</u>                       | <i>gapN</i>   | 1 693165     | 3.68  | GAAATGTTTACATAACGAATAAATGGCTATAATTTAAATA    |
| <u>CD0761</u>                       |               | 1 932667     | 4.6   | TTCATGTATAATTATTAACATACTGTTTAAATATTAATTG    |
| <u>CD1229</u>                       |               | 1 1427634    | 4     | AAATAGTATTAGCCCCTTAGAAATTGTCAATAATGAAATTA   |
| <u>CD1323</u>                       | <i>tepA</i>   | 1 1533409    | 1.68  | TATCTTAATAATTTTGATTT-ATTTGGTAAACTAAATTA     |
| <u>CD2470</u>                       | <i>gpr</i>    | -1 2852330   | 4     | TTCTTGTATATAAATACTAAATTTTGTAAACAATTATAATTA  |
| <u>CD2856</u>                       |               | -1 3339897   | 2.2   | ATTTAGAATAAATCCATGAA-TATGAGAAAAATAAGTATA    |
| <u>CD3564</u>                       | <i>spoIIR</i> | -1 4165994   | 4.8   | ATTATGAATAAATTAATTTT-AATTGGACATAATTGATGATA  |
| <u>CD2686</u>                       |               | -1 3106296   | 5.1   | ACCAAGTATAAAAAATATTATAATTGTAAAACCTTACAAA    |
| <u>CD2642</u>                       | <i>sigG</i>   | -1 3050598   | 25.84 | AAAAAGTATAAAAAAATTGG-AAATGTAAATAATTTCAATA   |
| <u>found in silico for sigF</u>     |               |              |       |                                             |
| <b>SigG-dependent promoters</b>     |               |              |       |                                             |
| <b>genes used for the consensus</b> |               |              |       |                                             |
| <u>CD0684</u>                       |               | -1 830199    | 4.12  | AACATGTATATTTTTCCATGAAAAATAAATAATAAAAAATA   |
| <u>CD0773</u>                       | <i>spoVAC</i> | 1 944348     | 2.3   | AATAGGTTTATTTTTTAAA-ATTAACAATAATACTTTA      |
| <u>CD1213</u>                       | <i>spoIVB</i> | 1 1411366    | 1.17  | TAAATGAATAAATTCAGG-AAAAAGGAATTTATAAATACA    |
| <u>CD1290</u>                       |               | 1 1498542    | 8.39  | ACCAATTATATAACAATCTTTT-ATTAGTAAAACTACTTA    |
| <u>CD1463</u>                       |               | 1 1691613    | 3.18  | ATAACATAATTTTTATTAATAATACAGATACTATTTATA     |
| <u>CD1543</u>                       |               | 1 1792456    | 4     | CAAAAGAATAGAATGGGTATATTTGTGAATAATAATA       |
| <u>CD1567</u>                       |               | 1 1814395    | 5.1   | ATTTGGAATAGTATTACAAC-TTAAGTAAATAATAATTTTG   |
| <u>CD1568</u>                       |               | 1 1815249    | 2.09  | TAAGTGTATATCTATTTGTT-TATTGCAAAACATATAATA    |
| <u>CD1880</u>                       |               | 1 2186344    | 1.25  | ATTTGTAAAGTGAGAATACTATTTTCTTATATGGTAT       |
| <u>CD2112</u>                       |               | -1 2441656   | 11.16 | ATTACAATAAATATATGTAC-TTTGGGAAAAATAAATATAG   |
| <u>CD2245.1</u>                     |               | -1 2599068   | 15    | CTTATGAATTTTATTTGTAA-AATTGCTAAAACCTATTACA   |
| <u>CD2375</u>                       |               | 1 2741458    | 4.63  | TAAGTGTATAAAATTTAGAT-AACTTCAATAAATAGTTTA    |
| <u>CD2465</u>                       |               | -1 2846279   | 3.07  | TAGACTAATAAAAAA-CTTTGGGAATACTAAAACCA        |
| <u>CD2688</u>                       | <i>sspA</i>   | -1 3107629   | 1.68  | TACCTGAATTAATAATGTTT-AAAATCAATAATATTATCA    |
| <u>CD2762</u>                       |               | -1 3211281   | 51    | GTTTTGATTAATAATGTAATATTTTGATAATAATACCTATTG  |
| <u>CD2808</u>                       |               | -1 3278805   | 17    | AAATTTGTATAAAAACCTTACAG-CTTGGAGAAAATAATAGA  |
| <u>CD2841</u>                       |               | -1 3323998   | 3.84  | ACAATGAATAGTATTTACTT-CTTGGCAACAATAAATTA     |
| <u>CD2845</u>                       | <i>rbr</i>    | 1 3326890    | 4.62  | ATTGAGCATAATTATATCTC-CTATTGGAATAATAAAT      |
| <u>CD3220.1</u>                     |               | -1 3769140   | 9.93  | TATTTGTATAAATTTATTTT-AATTGACAAAATACAAATA    |
| <u>CD3249</u>                       | <i>sspB</i>   | 1 3804245    | 3.08  | TTTCTGTATATATTATTTTATTTTGGGAAAATAGTATTA     |
| <u>CD3489</u>                       |               | -1 4079467   | 2.27  | TAATTTGAATAATATATCTAA-AAAAAGCCATCCTATTAT    |
| <u>CD3499</u>                       | <i>spoVT</i>  | -1 4088959   | 11    | TTTTTGTATATTTTCTTAAAC-AATGGTAAAAATAAACTTA   |
| <u>CD3551.1</u>                     |               | -1 4146872   | 12    | AATACGTATTTCTTTTTC-TTTCGGGAAAACCTAAACACA    |
| <u>CD0543</u>                       |               | 1 648057     | 4     | TATATGGATAAAAAACCTAGAAACTCCAAATATAAATAAGA   |
| <u>CD1291</u>                       | <i>dacF</i>   | 1 1498803    | 1.6   | ATTTAGAATAAAAAAGTTA-AATGTGAGAAAATAAGTTTAA   |
| <u>CD1354</u>                       |               | 1 1570520    | 2.96  | ATTGATACAAATAAATTTTAAATATTGGACATAATAAAATAG  |
| <u>CD1430</u>                       | <i>pdaA</i>   | -1 1658355   | 2     | ACTATAAATAATCAAACTATATATAAGAAATATATTTTAA    |
| <u>CD1707</u>                       |               | 1 1981481    | 3.13  | TTTGCATAAAAAAATTGTAAAAAGGGAAAACCTTAGTCA     |
| <u>CD1789</u>                       |               | -1 2072033   | 4     | ACTTTGAATTAATTTTFTA-TATAGGATATACTAATAAGTG   |
| <u>CD3610</u>                       |               | -1 4217455   | 4     | AAGGTGATTAATAATACATAAATAAAGGCTATAATAGTATGG  |
| <b>others</b>                       |               |              |       |                                             |
| <u>CD2636</u>                       |               | -1 3046122   | 18.19 | GAAGGGAATTTTTTTGTTT-TTTGCACAACTATATAA       |
| <u>CD1486</u>                       |               | 1 1721501    | 1.4   | TTTTTAGTAAATAAATATAA-AAATATAGAAATACTAAATTA  |
| <u>CD2809</u>                       |               | 1 3278964    | 42    | TAATGGTTATATTTCTGTAATATATGGACATAAATTTATAATA |
| <u>found in silico for sigG</u>     |               |              |       |                                             |

The transcriptional start sites and the -10 and -35 boxes are indicated in red and blue, respectively. The position of 5' start was identified by RNA-seq analysis with indicated score corresponding to the read length (51 bases) coverage ratio for TAP+ and TAP- samples. For  $\sigma^F$  and  $\sigma^G$ , the genes underlined are those validated by *in silico* analysis (see Materials and Methods) and listed in Table S8. TSS can be visualized at [https://mmonot.eu/COV2HTML/visualisation.php?str\\_id=-14](https://mmonot.eu/COV2HTML/visualisation.php?str_id=-14).
