# Supplementary material for: Genome-Wide Analysis of Cell Type-Specific Gene Transcription during Spore Formation in Clostridium difficile
Source: PubMed Central journal article supplement (PMC3789822; doi:10.1371/journal.pgen.1003756), 2013-10-03
Supplement: pgen.1003756.s011.pdf [file pgen.1003756.s011.pdf]

**Table S7. Identification of promoters recognized by  $\sigma^E$  and  $\sigma^K$**

**Promoters recognized by SigE-RNA polymerase holoenzyme**

| Gene                    |                 | sense | TSS position | score | promoters                                                              |
|-------------------------|-----------------|-------|--------------|-------|------------------------------------------------------------------------|
| <b>spacing 16-18 bp</b> |                 |       |              |       |                                                                        |
| CD0106                  | <i>cwlD</i>     | 1     | 123155       | 2.66  | TATATGGA <b>ATA</b> TTATAGTGTTTTTATAAG <b>TATACATA</b> TACA            |
| CD0124                  | <i>spoIID</i>   | 1     | 169491       | 11.3  | AGAAAGTT <b>ATA</b> AAATTAATAGGGTTGTT <b>CATATACT</b> TAAATA           |
| CD0126                  | <i>spoIIID</i>  | 1     | 171391       | 44.64 | AGCTTGTT <b>ATA</b> TTTTTGGTGTTTTT <b>CATATATAT</b> CATTA              |
| CD0314                  |                 | 1     | 382298       | 1.74  | AGTATGTT <b>ATA</b> AATGC'TTTGTGTAAAT <b>CATATAAT</b> AGTTTA           |
| CD1167                  | <i>recV</i>     | -1    | 1366292      | 3.54  | TTTTTCCA <b>TTA</b> TATAATATTT <b>CATT</b> TATATTATATAATAAA            |
| CD1192                  | <i>spoIIIAA</i> | 1     | 1394269      | 9.67  | TTTTGGTT <b>ATA</b> TCCTTGTCCTTTATA <b>AA</b> TAGAATTATATA             |
| CD1198                  | <i>spoIIIAG</i> | 1     | 1398222      | 9.72  | TAATAGT <b>ACT</b> AAAAGAGAGGAAGAAA <b>CA</b> TAAACTCTAATG             |
| CD1416                  |                 | 1     | 1640973      | 14.62 | ACTTAGT <b>AAT</b> TAAATTAATAGGTTGTAT <b>CATAAACT</b> TCATTTA          |
| CD1726                  |                 | 1     | 1999622      | 1.24  | ATAAAT <b>ACA</b> TATAAGATATTTTT <b>TAAG</b> AATAAAATTTATTA            |
| CD1746                  | <i>gltC</i>     | -1    | 2023841      | 3.8   | AATTAT <b>ACT</b> ACTGATCTTTTT <b>TAAT</b> ATACATTT <b>ATTA</b> ATA    |
| CD1884                  |                 | 1     | 2190340      | 6.95  | GATTGAGA <b>ATAG</b> GACAATTTTT <b>TAAG</b> ATACATA <b>AAATA</b> TAAAG |
| CD1940                  |                 | -1    | 2238053      | 14.36 | ATATAA <b>AGATA</b> TATTTTACTATTT <b>AAAT</b> GCATAT <b>CAT</b> TATA   |
| CD2247                  | <i>cspBA</i>    | -1    | 2604416      | 2.14  | TCTAAT <b>ACT</b> TTTAGACTCACACAAA <b>CA</b> TATACATTAATA              |
| CD2429.1                |                 | -1    | 2805180      | 1.04  | ATTGAT <b>GCATA</b> TATAGTATTTTATACAAA <b>ATATA</b> AAATATTATATA       |
| CD2629                  | <i>spoIVA</i>   | -1    | 3039083      | 43.97 | TTTTA <b>AGATA</b> TTAACCTTAACTCTAA <b>ATATA</b> ATTTTAATA             |
| CD2864                  |                 | -1    | 3350321      | 9.81  | TTTTAT <b>TCATA</b> TATATAAAAT <b>AA</b> CCAT <b>CATACAT</b> TTTCTTG   |
| CD2865                  |                 | -1    | 3350950      | 3.51  | TCTAAGTT <b>ATA</b> TGAAAAAGTTGTGAT <b>GCATACA</b> AA <b>TTA</b> ATA   |
| CD3235                  | <i>ssb</i>      | -1    | 3788231      | 3.85  | GATTTG <b>ATA</b> AAAAATACATCCCTTATA <b>AA</b> TATATTTTATTA            |
| CD3251                  |                 | -1    | 3806139      | 3.41  | TATAA <b>AGCATA</b> ATACAAGCTAATGAA <b>ATA</b> TATATTTATTTGTA          |
| CD3457                  |                 | -1    | 4051218      | 33.32 | TTTAGAG <b>CTA</b> AGATAAGTTTATA <b>AA</b> AT <b>CATATAT</b> TTAGAA    |
| CD3464                  |                 | -1    | 4057317      | 11.98 | ATGATATA <b>ATA</b> AAAGCTTTATACA <b>ATGA</b> ATAAACTGAAGTA            |
| CD3494                  |                 | -1    | 4084393      | 6.39  | ATTTTAGA <b>ATA</b> AAATTAATAGTCCCT <b>CTAG</b> TATATTTAATAGTA         |
| CD3542                  | <i>spmA</i>     | -1    | 4137832      | 19.99 | TTTCAAG <b>TATA</b> AGTATATAC <b>CTA</b> ACTAT <b>CATA</b> AAATTTATTTA |
| CD0129                  |                 | -1    | 173974       | 4     | AGTTAGG <b>CTT</b> TTTAAATGCTTTT <b>TAT</b> TCATATATTTTTTTG            |
| CD0311                  |                 | -1    | 373834       | 2.73  | GAATGC <b>ACATA</b> TTATAAACTTTTT <b>TA</b> TATATATATTTATTA            |
| CD1234                  |                 | 1     | 1437244      | 2.32  | AAATAAG <b>TATA</b> AGACAAGTTTATGAGTT <b>CATAT</b> TTTATAACA           |
| CD1319                  |                 | 1     | 1529627      | 10.44 | TTTAGT <b>GCATA</b> AACAGAGCTTATTTTT <b>TA</b> AGTATTTAAATA            |
| CD2000                  | <i>isp</i>      | -1    | 2311655      | 7.84  | TATGACT <b>CTA</b> AAAAATAAAAAATATAT <b>CATA</b> AAATATAAATA           |
| CD2443                  |                 | -1    | 2819700      | 1.52  | CAATATG <b>ATTAC</b> CTTTTCTTGTTTAA <b>ATA</b> TATATTTAGATATTA         |
| CD2445                  |                 | -1    | 2821093      | 5.22  | TTTTGG <b>ATA</b> ACGAGTCATATTTGAG <b>CATAT</b> CTATAATCA              |
| CD2641                  |                 | -1    | 3049708      | 27.8  | TATAGT <b>CAT</b> TTTTTTTACTTCGAT <b>ACATAT</b> TTATTTTFA              |
| CD2800                  |                 | -1    | 3272107      | 3.07  | TTAGTAA <b>TTA</b> AAAGCCTTTTCTCGAA <b>TATATAT</b> TAAATTTG            |
| CD2816                  |                 | 1     | 3286453      | 4     | TTATCTT <b>ATA</b> AAATATAGTTT <b>AGAT</b> TTATAATTTATAAA              |
| CD3248                  |                 | -1    | 3804051      | 10    | TTACAG <b>TACT</b> TTTTTGAGCTGAAAA <b>AAATA</b> AAATTTTAAATA           |
| CD3258                  |                 | -1    | 3816903      | 1.85  | AATAA <b>TAAATA</b> AAAAATAGTATCTTTG <b>TAA</b> ATATTTAAATA            |
| CD3298                  |                 | -1    | 3861389      | 17.82 | AAGCTG <b>ATA</b> AAATCTTATAATAT <b>GAATAT</b> CTTAATTA                |
| CD3483                  |                 | -1    | 4070891      | 11.68 | TTTAGG <b>TATG</b> TTATCATATTTCTATTT <b>TATATA</b> ATTTGTTA            |
| CD3521                  |                 | -1    | 4115392      | 3.76  | TATTGAT <b>ATA</b> TTTAAATATTACACT <b>ACA</b> TATATCTTTG               |
| CD3522                  |                 | -1    | 4116812      | 8.44  | AGAAGG <b>TACT</b> TTTTTTAATTTTGT <b>TAA</b> CATATATTTGTTA             |
| CD3567                  | <i>sipL</i>     | -1    | 4169365      | 1.75  | TAGGTG <b>ATA</b> TTTTTTTTGCTCCTT <b>AA</b> TATAAAATATAGTG             |
| CD3638                  |                 | -1    | 4248132      | 7.13  | TTTTAAG <b>TAT</b> CTTTTACATTAGATTT <b>TATA</b> AAATTTATTAATA          |

**spacing 15 bp**

|        |             |    |         |       |                                                              |
|--------|-------------|----|---------|-------|--------------------------------------------------------------|
| CD3455 |             | -1 | 4049892 | 46.84 | TAAATG <b>ATA</b> AAAAATAACAGCTAG <b>TAT</b> CATATAATAATAATA |
| CD2833 |             | -1 | 3311499 | 8.19  | GAAAAG <b>TATA</b> TACAAGCTATCATA <b>AGCATATA</b> ATTCCTTA   |
| CD0760 |             | 1  | 931632  | 4     | GAAAA <b>GCATAC</b> ATCTTCACAACT <b>GAAT</b> TTTTTATTTAATA   |
| CD1063 |             | 1  | 1255576 | 8.53  | ATGTAG <b>TATA</b> AAAGTATATTTGAT <b>GAATA</b> AACTTTATTTG   |
| CD1230 | <i>sigK</i> | -1 | 1444808 | 4     | TATATGTT <b>TTA</b> AAATCTAAAAATAT <b>GCATAT</b> TATTTTATTA  |
| CD1511 | <i>cotB</i> | -1 | 1748867 | 4.2   | TAATAT <b>ACATA</b> AAATTTAAATAT <b>TACGA</b> ATAAAGTATTATA  |

found in silico for sigE

**Promoters recognized by SigK-RNA polymerase holoenzyme**

| gene     |             | sense | position +1 | score | dRNA-seq                                                             |
|----------|-------------|-------|-------------|-------|----------------------------------------------------------------------|
| CD0120   | <i>glmS</i> | 1     | 163369      | 1.93  | CTTATATG <b>AC</b> CTAACTCTAAAAATATATA <b>ATA</b> ATATTTTTAG         |
| CD0551   | <i>sleC</i> | -1    | 658278      | 3.55  | ATTATTT <b>ACA</b> AAATTTCAAGCTATAT <b>TCATAT</b> CTTGAAATA          |
| CD0896   |             | 1     | 1079040     | 1.77  | AATCAT <b>TAGC</b> AAATAT <b>TAC</b> CCCTTAA <b>ACATAG</b> TATATTTTA |
| CD0902   |             | 1     | 1086288     | 19.98 | TAGAA <b>TGACA</b> AGTACAACCAATTTT <b>GA</b> ATATAAAATATAGTA         |
| CD1063.1 |             | 1     | 1256034     | 1.03  | TAGA <b>AGTACT</b> TATCTGTCTAT <b>TACTA</b> CATATATTTAATTA           |
| CD1063.2 |             | 1     | 1256423     | 1     | ATCAC <b>TAGC</b> AAAATGGAAACCAAT <b>GCATAG</b> TATATGTTA            |
| CD1067   |             | 1     | 1260209     | 3.78  | AGCA <b>AGTACA</b> ATTAAGATTATA <b>AAAGC</b> CATAGTATTAATTA          |
| CD1133   |             | 1     | 1332562     | 6.13  | AATGACT <b>ACAT</b> TTCTTGAGCTTTTT <b>GA</b> ATATACTATAAATA          |
| CD1433   | <i>cotE</i> | -1    | 1664675     | 12.48 | AAATAG <b>TACA</b> CTAATATGTATTAAT <b>TA</b> ATAGAATAAAATA           |
| CD1613   | <i>cotA</i> | -1    | 1868003     | 1.13  | CTTTT <b>GTA</b> ACTTTTTTACATTATA <b>AA</b> TATAATATTACTA            |
| CD1891   |             | -1    | 2196837     | 3.7   | TTTTT <b>GTA</b> ACTTACAATAAATTTTT <b>TA</b> ACTATATACTA             |

|               |             |    |         |      |                                                       |
|---------------|-------------|----|---------|------|-------------------------------------------------------|
| <u>CD1898</u> |             | -1 | 2201962 | 4.94 | AAAAAGAA <u>AC</u> AAAATTCCTAGGTTATGCATATATTAATAG     |
| <u>CD2144</u> |             | 1  | 2480394 | 3.26 | TATCTGTA <u>ACA</u> ATTTATCCATTTTACAACTATAACTAATA     |
| <u>CD2409</u> |             | -1 | 2781176 | 6.06 | TAAGTGAA <u>AC</u> GTATTTAATTATATTGCATATATATTGTA      |
| <u>CD2664</u> | <i>murE</i> | -1 | 3078113 | 4.3  | AACCATTC <u>AC</u> ATAGTAAAAAATTCCTAAATATAATATTATA    |
| <u>CD2968</u> | <i>dpaA</i> | -1 | 3450268 | 7.42 | TTTAGTGA <u>AC</u> CAATGTATTGATAAAAAACATATTGTATATAGTA |
| <u>CD3569</u> |             | -1 | 4170728 | 4    | ATTAGGAA <u>AC</u> AAAGTTTATATCGAACATAGTATAAACTA      |
| <u>CD3580</u> |             | -1 | 4180825 | 4    | TACCATT <u>AC</u> ATTATTACTGTTTTAAGCATATTATATTGTA     |
| <u>CD3613</u> |             | 1  | 4219362 | 5.26 | TAGATGTA <u>AC</u> AAAATCGCATCCATTTAAATATTGTATTTTA    |
| CD0564        |             | 1  | 671798  | 5.24 | GTATGATG <u>AC</u> TAATAATAAGAGTCTGTTTCATATACTTTAAT   |
| CD1230        | <i>sigK</i> | -1 | 1444765 | 4.63 | TAACAGTCA <u>AC</u> TTGGATAAGTCTCCTTCATATAATTTAAAG    |
| CD1518        | <i>feoA</i> | -1 | 1760860 | 4    | TAAAAGTA <u>AC</u> AAGGTAATAATAATAATGCATAGTTTAAATA    |
| CD1927        | <i>ytC</i>  | -1 | 2225857 | 5.12 | AAAATGGT <u>AC</u> AAATAGGTCATATTGTTAATAACATAATATA    |
| CD2184        |             | -1 | 2528930 | 5.2  | CACGGAGA <u>AC</u> TTTTACCTTCTCAATTAAATATATTATTATTA   |
| CD2459        |             | -1 | 2837573 | 8.34 | AAAAATTTGCATAGTGTAAACATTTTAAATATACTATATATATA          |

found in silico for sigK

#### candidates for SigK-dependent promoters

|        |                                                  |
|--------|--------------------------------------------------|
| CD0332 | tttac <u>AC</u> cagctaagccagtcaggAATAATTTaaagtg  |
| CD3230 | ttatc <u>AC</u> ataagaaattgtcgattCATATAATtatatag |
| CD3349 | aggtc <u>AC</u> aatcataactaaatttgaCATATTATatata  |
| CD1065 | atatc <u>AC</u> tcacaattcaccacttcAATATTATttctata |
| CD2399 | tagta <u>AC</u> gatttttaaatgattgAATATTATacactaga |
| CD0596 | taaag <u>AC</u> ctattaaaactaccagtTATAATATagaacca |

The transcriptional start sites and the -10 and -35 boxes are indicated in red and blue, respectively. The position of 5' start was identified by RNA-seq analysis with indicated score corresponding to the read length (51 bases) coverage ratio for TAP+ and TAP- sample. For  $\sigma^E$  and  $\sigma^K$ , the genes underlined are those validated by in silico analysis (see Materials and Methods) and listed in Table S8. TSS can be visualized at [https://mmonot.eu/COV2HTML/visualisation.php?str\\_id=-14](https://mmonot.eu/COV2HTML/visualisation.php?str_id=-14).
