# Supplementary material for: Genome-Wide Analysis of Cell Type-Specific Gene Transcription during Spore Formation in Clostridium difficile
Source: PubMed Central journal article supplement (PMC3789822; doi:10.1371/journal.pgen.1003756), 2013-10-03
Supplement: pgen.1003756.s012.pdf [file pgen.1003756.s012.pdf]

Table S8. *In silico* validation of promoters located upstream of genes identified in transcriptome as regulated by  $\sigma^F$ ,  $\sigma^B$ ,  $\sigma^G$  or  $\sigma^K$

**SigF-dependent promoter**

| locus_tag    | promoter_score | NC_014376  | C.saccharolytic | NC_009012 | C.thermocellur | NC_004557 | C.tetani | NC_011898 | C.cellulolyticur | NC_014328   | C.ljungdahlii | NC_011837 | C.kluyveri | NC_000964 | B.subtilis | dbtbs    |
|--------------|----------------|------------|-----------------|-----------|----------------|-----------|----------|-----------|------------------|-------------|---------------|-----------|------------|-----------|------------|----------|
| CD630_01250  | 4.94           | Closa_2891 | 4.80            | Cthe_2617 | 5.08           | CTC00316  | 3.68     | Ccel_0282 | 5.13             | CLJU_c02480 | 4.60          | CKR_3248  | 4.87       | 0         | 0          | 0        |
| CD630_03470  | 5.18           | 0          | 0               | 0         | 0              | 0         | 0        | 0         | 0                | 0           | 0             | 0         | 0          | 0         | 0          | 0        |
| CD630_05800  | 4.41           | Closa_1722 | 3.43            | 0         | 0              | 0         | 0        | 0         | 0                | 0           | 0             | 0         | 0          | BSU02470  | 2.85       | 0        |
| CD630_07610  | 5.07           | Closa_3948 | 2.60            | 0         | 0              | CTC01999  | 3.15     | Ccel_2488 | 3.81             | CLJU_c35420 | 4.10          | CKR_2939  | 4.10       | BSU04580  | 3.08       | 0        |
| CD630_12290  | 4.51           | Closa_2233 | 2.31            | Cthe_1011 | 4.74           | 0         | 0        | Ccel_1486 | 3.96             | 0           | 0             | CKR_3147  | 3.31       | 0         | 0          | 0        |
| CD630_13230  | 4.41           | Closa_2132 | 3.62            | Cthe_1097 | 4.57           | CTC01283  | ?        | Ccel_1703 | 4.71             | CLJU_c13240 | 3.91          | CKR_1336  | 3.19       | BSU16790  | 4.39       | 0        |
| CD630_24700  | 4.36           | Closa_0874 | 3.76            | Cthe_1038 | 4.20           | CTC02040  | 4.17     | Ccel_1978 | 4.06             | CLJU_c07910 | 5.21          | CKR_0808  | 4.47       | BSU25540  | 3.64       | BSU25540 |
| CD630_26420  | 5.42           | Closa_2347 | 3.67            | Cthe_0448 | 4.56           | CTC01128  | 3.65     | Ccel_2061 | 4.56             | CLJU_c12330 | 5.23          | CKR_1238  | 5.23       | BSU15330  | 4.13       | BSU15330 |
| CD630_28560  | 4.65           | 0          | 0               | 0         | 0              | 0         | 0        | 0         | 0                | 0           | 0             | 0         | 0          | 0         | 0          | 0        |
| CD630_35640  | 4.86           | Closa_0527 | 4.72            | Cthe_1920 | 3.43           | CTC00288  | 5.37     | Ccel_0292 | 4.00             | CLJU_c02150 | 5.39          | CKR_3285  | 5.20       | BSU36970  | 4.72       | BSU36970 |
| training set |                |            |                 |           |                |           |          |           |                  |             |               |           |            |           |            |          |

**SigE-dependent promoter**

| locus_tag    | promoter_score | NC_014376  | C.saccharolytic | NC_009012 | C.thermocellur | NC_004557 | C.tetani    | NC_011898 | C.cellulolyticur | NC_014328   | C.ljungdahlii | NC_011837 | C.kluyveri  | NC_000964 | B.subtilis | dbtbs    |
|--------------|----------------|------------|-----------------|-----------|----------------|-----------|-------------|-----------|------------------|-------------|---------------|-----------|-------------|-----------|------------|----------|
| CD630_01060  | 4.62           | Closa_0335 | 3.49            | Cthe_1804 | 4.05           | CTC02570  | 3.68        | Ccel_2890 | 3.55             | CLJU_c40690 | 3.67          | CKR_0251  | 4.55        | BSU01530  | 3.36       | BSU01530 |
| CD630_01240  | 5.00           | Closa_2893 | 2.53            | Cthe_2616 | 3.69           | CTC00315  | 4.44        | Ccel_0281 | 3.73             | CLJU_02470  | 4.17          | CKR_3249  | 4.44        | BSU36750  | 4.67       | BSU36750 |
| CD630_01260  | 4.45           | Closa_0373 | 3.69            | Cthe_2618 | 2.62           | 0         | 0           | 0         | 0                | CLJU_02490  | 4.06          | CKR_3247  | 3.62        | BSU36420  | 3.20       | 0        |
| CD630_03140  | 5.10           | 0          | 0               | 0         | 0              | 0         | 0           | Ccel_0665 | 4.01             | CLJU_01910  | 4.17          | CKR_3313  | <b>4.82</b> | BSU18190  | 4.35       | 0        |
| CD630_11670  | 4.38           | 0          | 0               | Cthe_2286 | 3.95           | 0         | 0           | 0         | 0                | 0           | 0             | 0         | 0           | 0         | 0          | 0        |
| CD630_11920  | 4.49           | Closa_3252 | 3.32            | Cthe_0845 | 3.79           | CTC01589  | 4.04        | Ccel_1916 | 3.31             | CLJU_11030  | 3.67          | CKR_1115  | 4.44        | BSU24430  | 4.47       | BSU24430 |
| CD630_11980  | 4.49           | Closa_3246 | 3.17            | Cthe_0839 | 3.34           | CTC01584  | 3.62        | Ccel_1910 | 4.07             | CLJU_11090  | 3.28          | CKR_1121  | 3.28        | BSU24370  | 2.84       | BSU24370 |
| CD630_14160  | 4.62           | Closa_2820 | 4.12            | 0         | 0              | 0         | 0           | 0         | 0                | 0           | 0             | 0         | 0           | 0         | 0          | 0        |
| CD630_17260  | 4.82           | 0          | 0               | 0         | 0              | 0         | 0           | 0         | 0                | CLJU_04710  | 4.44          | 0         | 0           | 0         | 0          | 0        |
| CD630_17460  | 4.34           | 0          | 0               | 0         | 0              | CTC02306  | 3.95        | 0         | 0                | 0           | 0             | 0         | 0           | 0         | 0          | 0        |
| CD630_18840  | 5.10           | 0          | 0               | 0         | 0              | 0         | 0           | 0         | 0                | 0           | 0             | 0         | 0           | 0         | 0          | 0        |
| CD630_19400  | 4.59           | 0          | 0               | 0         | 0              | 0         | 0           | 0         | 0                | 0           | 0             | 0         | 0           | 0         | 0          | 0        |
| CD630_22470  | 4.24           | Closa_1425 | 4.34            | 0         | 0              | CTC02345  | 4.33        | 0         | 0                | 0           | 0             | 0         | 0           | 0         | 0          | 0        |
| CD630_24291  | 4.44           | 0          | 0               | 0         | 0              | 0         | 0           | 0         | 0                | 0           | 0             | 0         | 0           | 0         | 0          | 0        |
| CD630_26290  | 4.82           | Closa_2078 | 3.32            | Cthe_1021 | 3.69           | CTC01140  | 4.17        | 0         | 0                | CLJU_12490  | 4.44          | CKR_1258  | 4.17        | BSU22800  | 4.40       | BSU22800 |
| CD630_28330  | 5.10           | 0          | 0               | 0         | 0              | 0         | 0           | 0         | 0                | 0           | 0             | 0         | 0           | 0         | 0          | 0        |
| CD630_28640  | 4.61           | Closa_4245 | 4.50            | Cthe_3133 | 4.05           | CTC01150  | 4.06        | Ccel_2497 | 3.95             | CLJU_30810  | 3.40          | CKR_0686  | 3.58        | BSU10900  | 3.18       | 0        |
| CD630_28650  | 4.88           | Closa_1072 | 3.34            | 0         | 0              | 0         | 0           | 0         | 0                | CLJU_19700  | 4.82          | 0         | 0           | 0         | 0          | 0        |
| CD630_32350  | 4.55           | Closa_1571 | <b>4.45</b>     | Cthe_0559 | 3.80           | CTC02296  | <b>4.72</b> | Ccel_1522 | <b>4.44</b>      | CLJU_34620  | 3.95          | CKR_2845  | 3.36        | 0         | 0          | 0        |
| CD630_32510  | 4.55           | 0          | 0               | 0         | 0              | 0         | 0           | Ccel_1651 | 3.19             | 0           | 0             | 0         | 0           | 0         | 0          | 0        |
| CD630_34550  | 4.34           | Closa_0798 | 3.34            | Cthe_1857 | 3.63           | CTC02507  | 4.72        | Ccel_2904 | 3.67             | CLJU_03090  | 4.33          | CKR_3153  | 3.69        | BSU35240  | 4.25       | 0        |
| CD630_34570  | 4.32           | 0          | 0               | 0         | 0              | 0         | 0           | 0         | 0                | 0           | 0             | 0         | 0           | 0         | 0          | 0        |
| CD630_34640  | 4.72           | 0          | 0               | 0         | 0              | CTC02514  | 4.06        | 0         | 0                | CLJU_03020  | 4.22          | CKR_3161  | 4.22        | 0         | 0          | 0        |
| CD630_34940  | 3.31           | 0          | 0               | Cthe_2659 | 5.10           | 0         | 0           | Ccel_3083 | 4.13             | CLJU_c41650 | 4.83          | CKR_0134  | 4.83        | BSU00600  | 4.37       | BSU00600 |
| CD630_35420  | 5.10           | Closa_0042 | 4.06            | Cthe_2099 | 4.62           | CTC00238  | 4.45        | Ccel_0165 | 4.45             | CLJU_01700  | 4.07          | CKR_3332  | 4.45        | BSU23180  | 3.44       | 0        |
| training set |                |            |                 |           |                |           |             |           |                  |             |               |           |             |           |            |          |

**SigG-dependent promoter**

| locus_tag   | promoter_weigh | NC_014376  | C.saccharolytic | NC_009012 | C.thermocellur | NC_004557 | C.tetani    | NC_011898 | C.cellulolyticur | NC_014328   | C.ljungdahlii | NC_011837 | C.kluyveri  | NC_000964 | B.subtilis | dbtbs |
|-------------|----------------|------------|-----------------|-----------|----------------|-----------|-------------|-----------|------------------|-------------|---------------|-----------|-------------|-----------|------------|-------|
| CD630_07730 | 4.12           | Closa_1565 | 3.20            | Cthe_0122 | 3.53           | CTC02245  | 3.57        | Ccel_2282 | <b>4.27</b>      | CLJU_c20910 | 3.25          | CKR_1481  | 3.25        | BSU23420  | 2.45       | 0     |
| CD630_23750 | 4.74           | Closa_2298 | <b>4.59</b>     | 0         | 0              | 0         | 0           | 0         | 0                | 0           | 0             | 0         | 0           | 0         | 0          | 0     |
| CD630_14300 | 4.62           | 0          | 0               | Cthe_1385 | <b>4.21</b>    | 0         | 0           | Ccel_1457 | 3.02             | 0           | 0             | 0         | 0           | BSU35300  | 3.85       | 0     |
| CD630_26880 | 4.25           | 0          | 0               | 0         | 0              | 0         | 0           | 0         | 0                | CLJU_c21860 | 3.54          | CKR_1432  | 3.77        | BSU09750  | 2.84       | 0     |
| CD630_32490 | 4.00           | Closa_1963 | 3.53            | 0         | 0              | 0         | 0           | Ccel_1561 | <b>4.19</b>      | CLJU_c29720 | 2.94          | CKR_3038  | 3.39        | 0         | 0          | 0     |
| CD630_06840 | 4.62           | 0          | 0               | 0         | 0              | 0         | 0           | 0         | 0                | 0           | 0             | 0         | 0           | 0         | 0          | 0     |
| CD630_12130 | 4.21           | Closa_3227 | 3.70            | Cthe_0813 | 3.11           | CTC01570  | <b>4.05</b> | Ccel_1895 | 3.47             | CLJU_c11210 | <b>4.05</b>   | CKR_1133  | <b>4.05</b> | BSU24230  | 3.94       | 0     |
| CD630_12900 | 4.15           | 0          | 0               | 0         | 0              | 0         | 0           | 0         | 0                | 0           | 0             | 0         | 0           | 0         | 0          | 0     |
| CD630_14630 | 4.14           | 0          | 0               | 0         | 0              | 0         | 0           | 0         | 0                | 0           | 0             | 0         | 0           | 0         | 0          | 0     |
| CD630_14860 | 4.07           | 0          | 0               | 0         | 0              | 0         | 0           | 0         | 0                | 0           | 0             | 0         | 0           | 0         | 0          | 0     |
| CD630_15430 | 4.54           | 0          | 0               | 0         | 0              | 0         | 0           | Ccel_0642 | <b>4.34</b>      | CLJU_c25150 | <b>4.58</b>   | 0         | 0           | BSU33540  | 4.24       | 0     |

|              |      |            |             |           |             |          |             |           |             |             |             |          |             |          |      |   |
|--------------|------|------------|-------------|-----------|-------------|----------|-------------|-----------|-------------|-------------|-------------|----------|-------------|----------|------|---|
| CD630_15670  | 4.54 | 0          | 0           | 0         | 0           | 0        | 0           | 0         | 0           | CLJU_c18620 | <b>4.10</b> | CKR_0429 | <b>4.09</b> | BSU04430 | 3.75 | 0 |
| CD630_15680  | 4.21 | 0          | 0           | Cthe_0291 | <b>4.62</b> | CTC00965 | <b>4.28</b> | Ccel_0215 | <b>4.26</b> | CLJU_c18640 | <b>4.10</b> | CKR_1034 | 3.11        | BSU40820 | 3.39 | 0 |
| CD630_18800  | 4.36 | 0          | 0           | 0         | 0           | 0        | 0           | 0         | 0           | 0           | 0           | 0        | 0           | 0        | 0    | 0 |
| CD630_21120  | 4.10 | 0          | 0           | 0         | 0           | 0        | 0           | 0         | 0           | 0           | 0           | 0        | 0           | 0        | 0    | 0 |
| CD630_22451  | 4.02 | 0          | 0           | 0         | 0           | 0        | 0           | Ccel_1165 | 3.36        | 0           | 0           | 0        | 0           | 0        | 0    | 0 |
| CD630_24650  | 4.11 | Closa_1536 | 3.48        | 0         | 0           | CTC00932 | <b>4.01</b> | 0         | 0           | CLJU_c24320 | <b>4.34</b> | CKR_3010 | 3.55        | BSU12860 | 3.60 | 0 |
| CD630_26360  | 4.14 | 0          | 0           | 0         | 0           | 0        | 0           | 0         | 0           | 0           | 0           | 0        | 0           | 0        | 0    | 0 |
| CD630_27620  | 4.04 | Closa_0920 | 3.21        | 0         | 0           | CTC01360 | 3.90        | 0         | 0           | CLJU_c35470 | <b>4.26</b> | CKR_2944 | 3.81        | 0        | 0    | 0 |
| CD630_28080  | 4.28 | 0          | 0           | 0         | 0           | 0        | 0           | 0         | 0           | 0           | 0           | 0        | 0           | 0        | 0    | 0 |
| CD630_28410  | 4.19 | 0          | 0           | 0         | 0           | 0        | 0           | 0         | 0           | 0           | 0           | 0        | 0           | BSU29550 | 2.79 | 0 |
| CD630_28450  | 4.62 | Closa_2922 | <b>4.15</b> | 0         | 0           | 0        | 0           | Ccel_0893 | <b>4.27</b> | 0           | 0           | 0        | 0           | 0        | 0    | 0 |
| CD630_32201  | 4.58 | Closa_2419 | 3.37        | Cthe_1856 | <b>4.67</b> | 0        | 0           | Ccel_2903 | <b>4.74</b> | CLJU_c34580 | <b>4.58</b> | CKR_2841 | <b>4.58</b> | 0        | 0    | 0 |
| CD630_34890  | 4.22 | 0          | 0           | 0         | 0           | 0        | 0           | 0         | 0           | 0           | 0           | 0        | 0           | 0        | 0    | 0 |
| CD630_34990  | 4.58 | Closa_4072 | <b>4.70</b> | Cthe_2655 | <b>4.62</b> | CTC00196 | <b>4.32</b> | Ccel_3088 | <b>4.62</b> | CLJU_c41700 | <b>4.32</b> | CKR_0129 | <b>4.32</b> | BSU00560 | 3.24 | 0 |
| CD630_35511  | 4.10 | Closa_4144 | <b>4.74</b> | 0         | 0           | 0        | 0           | Ccel_3342 | <b>4.54</b> | CLJU_c06720 | <b>4.26</b> | CKR_1348 | 3.39        | BSU31380 | 4.30 | 0 |
| training set |      |            |             |           |             |          |             |           |             |             |             |          |             |          |      |   |

#### SigK-dependent promoter

| locus_tag    | promoter_weight | NC_014376  | C.saccharolytic | NC_009012 | C.thermocellur | NC_004557 | C.tetani | NC_011898 | C.cellulolyticur | NC_014328   | C.ljungdahlii | NC_011837 | C.kluyveri | NC_000964 | B.subtilis | dbtbs    |
|--------------|-----------------|------------|-----------------|-----------|----------------|-----------|----------|-----------|------------------|-------------|---------------|-----------|------------|-----------|------------|----------|
| CD630_01200  | 4.75            | Closa_2018 | 3.08            | Cthe_1162 | 2.76           | CTC02543  | 3.20     | Ccel_1205 | 3.14             | CLJU_c40420 | 3.65          | CKR_0268  | 3.77       | BSU01780  | 2.93       | 0        |
| CD630_05510  | 4.80            | Closa_1279 | 4.17            | 0         | 0              | CTC02343  | 4.28     | 0         | 0                | 0           | 0             | 0         | 0          | 0         | 0          | 0        |
| CD630_08960  | 4.52            | 0          | 0               | 0         | 0              | 0         | 0        | 0         | 0                | 0           | 0             | 0         | 0          | 0         | 0          | 0        |
| CD630_09020  | 4.79            | 0          | 0               | 0         | 0              | 0         | 0        | 0         | 0                | 0           | 0             | 0         | 0          | 0         | 0          | 0        |
| CD630_10631  | 4.93            | 0          | 0               | 0         | 0              | 0         | 0        | 0         | 0                | 0           | 0             | 0         | 0          | 0         | 0          | 0        |
| CD630_10632  | 4.52            | 0          | 0               | 0         | 0              | 0         | 0        | 0         | 0                | 0           | 0             | 0         | 0          | 0         | 0          | 0        |
| CD630_10670  | 5.04            | 0          | 0               | 0         | 0              | 0         | 0        | 0         | 0                | 0           | 0             | 0         | 0          | 0         | 0          | 0        |
| CD630_11330  | 4.74            | 0          | 0               | 0         | 0              | 0         | 0        | 0         | 0                | 0           | 0             | 0         | 0          | 0         | 0          | 0        |
| CD630_14330  | 5.25            | Closa_3862 | <b>5.28</b>     | Cthe_0270 | 3.16           | CTC00894  | 4.39     | Ccel_1550 | 3.81             | 0           | 0             | CKR_0314  | 3.81       | BSU14220  | 3.55       | 0        |
| CD630_16130  | 5.45            | 0          | 0               | 0         | 0              | 0         | 0        | 0         | 0                | 0           | 0             | 0         | 0          | 0         | 0          | 0        |
| CD630_18910  | 4.72            | Closa_1551 | 4.22            | Cthe_2575 | 3.39           | CTC00407  | 3.14     | Ccel_0878 | 3.43             | CLJU_c34710 | 3.50          | CKR_2853  | 2.98       | BSU30595  | 3.91       | BSU30595 |
| CD630_18980  | 5.15            | 0          | 0               | 0         | 0              | CTC01537  | 3.74     | 0         | 0                | 0           | 0             | 0         | 0          | 0         | 0          | 0        |
| CD630_21440  | 4.72            | Closa_2167 | 3.82            | 0         | 0              | 0         | 0        | Ccel_3212 | 4.28             | CLJU_c05850 | <b>4.45</b>   | 0         | 0          | BSU29070  | 3.16       | 0        |
| CD630_24090  | 4.51            | 0          | 0               | 0         | 0              | 0         | 0        | 0         | 0                | 0           | 0             | 0         | 0          | 0         | 0          | 0        |
| CD630_26640  | 5.05            | Closa_2129 | 3.24            | Cthe_0978 | 4.17           | CTC01632  | 2.94     | Ccel_0479 | 3.60             | CLJU_c10570 | 3.07          | CKR_1082  | 4.13       | BSU15180  | 3.55       | 0        |
| CD630_29680  | 4.64            | Closa_0221 | 3.29            | Cthe_0420 | 3.48           | 0         | 0        | Ccel_1705 | 3.69             | 0           | 0             | 0         | 0          | BSU16730  | 3.63       | BSU16730 |
| CD630_35690  | 4.97            | 0          | 0               | Cthe_2400 | 4.48           | CTC00279  | 4.16     | Ccel_0237 | 3.00             | CLJU_c02060 | 4.17          | CKR_3293  | 4.17       | BSU00430  | 2.66       | BSU00430 |
| CD630_35800  | 5.41            | 0          | 0               | 0         | 0              | 0         | 0        | 0         | 0                | 0           | 0             | 0         | 0          | 0         | 0          | 0        |
| CD630_36130  | 5.14            | 0          | 0               | 0         | 0              | 0         | 0        | 0         | 0                | 0           | 0             | 0         | 0          | 0         | 0          | 0        |
| training set |                 |            |                 |           |                |           |          |           |                  |             |               |           |            |           |            |          |

We analyzed the promoters identified by TSS mapping by an iterative *in silico* strategy as described in materials and methods. The training sets of genes used to first construct the recognition profiles for  $\sigma^E$ ,  $\sigma^F$ ,  $\sigma^G$  and  $\sigma^H$  were highlighted in yellow. For each promoter the score was obtained as defined in materials and methods. Using the same profiles, we searched the intergenic regions (positions (-100 +10) relative to start codons) of six closely related *Clostridium* species, *C. saccharolyticum*, *C. thermocellum*, *C. tetani*, *C. cellulolyticum*, *C. ljungdahlii*, *C. kluyveri*. We also analyzed the *B. subtilis* promoters using the DBTBS database [73]. The absence of an orthologous gene is indicated by 0. When an orthologous gene is present the score and the locus-tag are indicated.
