# Supplementary material for: Genome-Wide Analysis of Cell Type-Specific Gene Transcription during Spore Formation in Clostridium difficile
Source: PubMed Central journal article supplement (PMC3789822; doi:10.1371/journal.pgen.1003756), 2013-10-03
Supplement: pgen.1003756.s013.pdf [file pgen.1003756.s013.pdf]

**Table S9. Complementation of the mutants inactivated for the Sigma factors of sporulation**

**Complementation of the *sigF* mutant**

|        |               | <i>sigF</i> /630Δerm | complemented <i>sigF</i> /630Δerm |
|--------|---------------|----------------------|-----------------------------------|
| CD2469 | <i>spoIIP</i> | 0.001                | 12                                |
| CD3564 | <i>spoIIR</i> | 0.03                 | 9                                 |
| CD3499 | <i>spoVT</i>  | 0.004                | 19                                |

**Complementation of the *sigE* mutant**

|        |                 | <i>sigE</i> /630Δerm | complemented <i>sigE</i> /630Δerm |
|--------|-----------------|----------------------|-----------------------------------|
| CD1198 | <i>spoIIIAG</i> | 0.002                | 2                                 |
| CD0126 | <i>spoIIID</i>  | 0.001                | 0.7                               |
| CD2629 | <i>spoIVA</i>   | 0.004                | 2.5                               |
| CD1230 | <i>sigK</i>     | 0.002                | 0.4                               |

**Complementation of the *sigG* mutant**

|          |              | <i>sigG</i> /630Δerm | complemented <i>sigG</i> /630Δerm |
|----------|--------------|----------------------|-----------------------------------|
| CD2688   | <i>sspA</i>  | 0.02                 | 0.7                               |
| CD3249   | <i>sspB</i>  | 0.07                 | 1.2                               |
| CD3499   | <i>spoVT</i> | 0.08                 | 0.5                               |
| CD3551.1 |              | 0.006                | 1.3                               |

**Complementation of the *sigK* mutant**

|        |             | <i>sigK</i> /630Δerm | complemented <i>sigK</i> /630Δerm |
|--------|-------------|----------------------|-----------------------------------|
| CD2401 | <i>cotD</i> | 0.005                | 0.15                              |
| CD0551 | <i>sleC</i> | 0.011                | 0.25                              |
| CD1433 | <i>cotE</i> | 0.01                 | 0.15                              |
| CD1613 | <i>cotA</i> | 0.0005               | 0.05                              |

qRT-PCR experiments were performed on two different RNA preparations for each mutant and each complemented strain. Cells were harvested after 14h of growth for the strain 630Δerm, the *sigE* and *sigF* mutants and the *sigF* mutant containing pMTL84121-*sigF* and the *sigE* mutant containing pMTL84121-*sigE* after 20h of growth for the strain 630Δerm, the *sigG* mutant and the *sigG* mutant containing pMTL84121-*sigG* and after 24 h of growth for the strain 630Δerm, the *sigK* mutant and the *sigK* mutant containing pMTL84121-*sigK*. The results presented corresponded to the mean of at least two independent experiments.
