# Supplementary material for: Genome-Wide Analysis of Cell Type-Specific Gene Transcription during Spore Formation in Clostridium difficile
Source: PubMed Central journal article supplement (PMC3789822; doi:10.1371/journal.pgen.1003756), 2013-10-03
Supplement: pgen.1003756.s014.pdf [file pgen.1003756.s014.pdf]

**Table S10. List of genes controlled by SpoIIID in transcriptome**

| <b>Gene</b>        | <b>Function</b>                                           | <b>Expression ratio<br/>in transcriptome<br/><i>spoIIID</i>/630Δerm</b> |
|--------------------|-----------------------------------------------------------|-------------------------------------------------------------------------|
| <b>sporulation</b> |                                                           |                                                                         |
| CD1214             | <i>spo0A</i> Stage 0 sporulation protein A                | <b>0.47</b>                                                             |
| CD2644             | <i>spoIIGA</i> Sigma-E factor processing peptidase        | <b>2.36</b>                                                             |
| CD2643             | <i>sigE</i> RNA polymerase sigma-E factor                 | <b>1.85</b>                                                             |
| CD2642             | <i>sigG</i> RNA polymerase sigma-G factor                 | <b>2.72</b>                                                             |
| CD3490             | <i>spoIIE</i> Phosphoprotein phosphatase                  | <b>3.14</b>                                                             |
| CD3563             | <i>sleB</i> Spore-cortex-lytic protein                    | <b>1.94</b>                                                             |
| CD0125             | <i>spoIIQ</i> Stage II sporulation protein Q              | <b>3.02</b>                                                             |
| CD1192             | <i>spoIIIAA</i> Stage III sporulation protein AA          | <b>3.85</b>                                                             |
| CD1193             | <i>spoIIIAB</i> Stage III sporulation protein AB          | <b>3.81</b>                                                             |
| CD1194             | <i>spoIIIAC</i> Stage III sporulation protein AC          | <b>4.91</b>                                                             |
| CD1195             | <i>spoIIIAD</i> Stage III sporulation protein AD          | <b>3.44</b>                                                             |
| CD1196             | <i>spoIIIAE</i> Stage III sporulation protein AE          | <b>2.42</b>                                                             |
| CD1197             | <i>spoIIIAF</i> Stage III sporulation protein AF          | <b>3.63</b>                                                             |
| CD1198             | <i>spoIIIAG</i> Stage III sporulation protein AG          | <b>7.75</b>                                                             |
| CD1199             | <i>spoIIIAH</i> Stage III sporulation protein AH          | <b>3.31</b>                                                             |
| CD2629             | <i>spoIVA</i> Stage IV sporulation protein A              | <b>3.54</b>                                                             |
| CD3567             | <i>sipL</i> SpoIVA-Interacting protein, coat localization | <b>3.06</b>                                                             |
| CD3541             | <i>spmB</i> Spore maturation protein B                    | <b>2.04</b>                                                             |
| CD1511             | <i>cotB</i> Spore outer coat layer protein CotB           | <b>3.54</b>                                                             |
| CD2688             | <i>sspA</i> Small, acid-soluble spore protein alpha       | <b>13.45</b>                                                            |
| CD3249             | <i>sspB</i> Small, acid-soluble spore protein alpha       | <b>11.62</b>                                                            |
| CD3499             | <i>spoVT</i> Stage V sporulation protein T                | <b>2.26</b>                                                             |
| CD3349             | <i>bclA3</i> Exosporium glycoprotein BclA3                | <b>0.19</b>                                                             |
| <b>stress</b>      |                                                           |                                                                         |
| CD1631             | <i>sodA</i> Spore coat protein, superoxide dismutase      | <b>2.87</b>                                                             |
| CD2865             | Putative bacterioferritin                                 | <b>2.20</b>                                                             |
| <b>envelopes</b>   |                                                           |                                                                         |
| CD0147             | Putative transporter                                      | <b>20.56</b>                                                            |
| CD1416             | Putative membrane protein                                 | <b>2.24</b>                                                             |
| CD1928             | Putative membrane protein                                 | <b>3.05</b>                                                             |
| CD2445             | Transmembrane signaling protein, TspO                     | <b>2.37</b>                                                             |
| CD2737             | Putative nitrilase/cyanide hydratase                      | <b>2.25</b>                                                             |
| CD2738             | Putative cytosine permease                                | <b>2.14</b>                                                             |
| CD2833             | Putative calcium-transporting ATPase                      | <b>2.25</b>                                                             |
| CD2800             | Putative membrane protein                                 | <b>2.60</b>                                                             |
| CD3073             | Putative membrane protein                                 | <b>2.19</b>                                                             |
| CD2664             | <i>murE</i> UDP-N-acetylmuramyl-tripeptide synthetase     | <b>1.93</b>                                                             |
| CD0090             | <i>prlA</i> Preprotein translocase SecY subunit           | <b>0.44</b>                                                             |
| <b>metabolism</b>  |                                                           |                                                                         |
| CD0740             | Putative PLP-dependent aminotransferase                   | <b>2.17</b>                                                             |
| CD0777             | Putative membrane protein                                 | <b>1.96</b>                                                             |
| CD0778             | Conserved hypothetical protein                            | <b>2.15</b>                                                             |
| CD0779             | Putative amidohydrolase, M20D peptidase family            | <b>2.13</b>                                                             |
| CD0780             | Conserved hypothetical protein, DUF1177 family            | <b>2.46</b>                                                             |
| CD0994             | Putative serine-pyruvate aminotransferase                 | <b>1.91</b>                                                             |
| CD0995             | <i>serA</i> Putative D-3-phosphoglycerate dehydrogenase   | <b>2.95</b>                                                             |
| CD0996             | Conserved hypothetical protein                            | <b>2.22</b>                                                             |
| CD1319             | Putative polysaccharide deacetylase                       | <b>3.24</b>                                                             |
| CD1697             | <i>ribH</i> 6,7-dimethyl-8-ribityllumazine synthase       | <b>15.04</b>                                                            |
| CD1698             | <i>ribBA</i> Riboflavin biosynthesis protein ribBA        | <b>5.68</b>                                                             |
| CD1699             | <i>ribE</i> Riboflavin synthase alpha subunit             | <b>3.84</b>                                                             |
| CD1700             | <i>ribD</i> Riboflavin biosynthesis protein ribD          | <b>3.88</b>                                                             |
| CD1749             | Putative 2-hydroxyacyl-CoA dehydratase                    | <b>1.94</b>                                                             |
| CD1750             | Putative CoA enzyme activase                              | <b>2.20</b>                                                             |

|                                     |             |                                                           |             |
|-------------------------------------|-------------|-----------------------------------------------------------|-------------|
| CD1767                              | <i>gapB</i> | Glyceraldehyde-3-phosphate dehydrogenase                  | <b>2.70</b> |
| CD2387                              |             | $\alpha$ -hydroxy acid dehydrogenase, FMN-dependent       | <b>2.02</b> |
| CD2819                              |             | Putative amino acid racemase                              | <b>2.25</b> |
| CD2864                              |             | Putative hydrolase                                        | <b>4.00</b> |
| CD3236                              |             | Putative membrane protein                                 | <b>1.89</b> |
| CD3238                              |             | Putative component of proline reductase <i>prdE</i> -like | <b>1.96</b> |
| CD3241                              | <i>prdB</i> | Proline reductase (selenocysteine)                        | <b>2.07</b> |
| CD3243                              |             | Conserved hypothetical protein                            | <b>2.19</b> |
| CD3244                              | <i>prdA</i> | D-proline reductase proprotein <i>prdA</i>                | <b>2.09</b> |
| CD3248                              |             | Polysaccharide deacetylase                                | <b>2.27</b> |
| CD3257                              |             | Putative polysaccharide deacetylase                       | <b>2.13</b> |
| CD3258                              |             | Iron hydrogenase                                          | <b>2.26</b> |
| CD3489                              |             | Putative oligoendopeptidase F, peptidase M3B family       | <b>2.29</b> |
| CD2323                              |             | Putative sugar-phosphate dehydrogenase                    | <b>0.53</b> |
| CD2324                              |             | Putative sugar-phosphate dehydrogenase                    | <b>0.44</b> |
| CD2325                              | <i>gatC</i> | PTS system, galactitol-specific IIC component             | <b>0.47</b> |
| CD2326                              |             | PTS system, lactose/cellobiose specific IIB compo         | <b>0.47</b> |
| CD2327                              | <i>gatA</i> | PTS system, galactitol-specific IIA component             | <b>0.48</b> |
| CD2600                              | <i>cstA</i> | Carbon starvation protein, CstA                           | <b>0.42</b> |
| <b>regulators</b>                   |             |                                                           |             |
| CD2214                              | <i>sinR</i> | Transcriptional regulator, HTH-type                       | <b>8.23</b> |
| CD2215                              |             | Transcriptional regulator, HTH-type                       | <b>8.22</b> |
| <b>miscellaenous</b>                |             |                                                           |             |
| CD0356                              | <i>xis</i>  | Excisionase Tn916-like, CTn1-Orf2                         | <b>2.45</b> |
| CD3235                              | <i>ssb</i>  | Single-stranded DNA-binding protein                       | <b>3.63</b> |
| CD2517.1                            |             | Putative phage protein                                    | <b>0.25</b> |
| <b>proteins of unknown function</b> |             |                                                           |             |
| CD0311                              |             | Conserved hypothetical protein                            | <b>4.12</b> |
| CD1063                              |             | Conserved hypothetical protein                            | <b>2.95</b> |
| CD1463                              |             | Conserved hypothetical protein                            | <b>2.41</b> |
| CD1726                              |             | Conserved hypothetical protein                            | <b>3.87</b> |
| CD1941                              |             | Conserved hypothetical protein                            | <b>2.38</b> |
| CD2046                              |             | Conserved hypothetical protein                            | <b>2.25</b> |
| CD2098                              |             | Conserved hypothetical protein                            | <b>2.09</b> |
| CD2112                              |             | Conserved hypothetical protein                            | <b>2.76</b> |
| CD2245.1                            |             | Conserved hypothetical protein                            | <b>3.35</b> |
| CD2366                              |             | Conserved hypothetical protein                            | <b>2.76</b> |
| CD2369                              |             | Conserved hypothetical protein                            | <b>2.70</b> |
| CD2375                              |             | Conserved hypothetical protein                            | <b>5.09</b> |
| CD2409                              |             | Conserved hypothetical protein                            | <b>2.28</b> |
| CD2752                              |             | Conserved hypothetical protein                            | <b>2.30</b> |
| CD2808                              |             | Conserved hypothetical protein                            | <b>3.04</b> |
| CD2809                              |             | Conserved hypothetical protein                            | <b>2.52</b> |
| CD3457                              |             | Conserved hypothetical protein                            | <b>2.62</b> |
| CD3610                              |             | Conserved hypothetical protein                            | <b>2.13</b> |
| CD3618                              |             | Conserved hypothetical protein                            | <b>2.31</b> |
| CD1067                              |             | Conserved hypothetical protein                            | <b>0.03</b> |
| CD2216                              |             | Conserved hypothetical protein                            | <b>0.39</b> |

RNA was extracted from strain 630 $\Delta$ erm strain and the *spoIIID* mutant after 15 h of growth in a sporulation medium. A gene is considered differentially expressed between the 630 $\Delta$ erm strain and the *spoIIID* mutant when the P value is <0.05 using the statistical analysis described in Materials and Methods
