# Supplementary material for: Genome-Wide Analysis of Cell Type-Specific Gene Transcription during Spore Formation in Clostridium difficile
Source: PubMed Central journal article supplement (PMC3789822; doi:10.1371/journal.pgen.1003756), 2013-10-03
Supplement: pgen.1003756.s015.pdf [file pgen.1003756.s015.pdf]

**Table S11. Control of expression of sporulation genes by SpoIID, SpoVT or SpoIIR****Positive control by SpoIID**

| gene          |              | <i>spoIID/630Δerm</i> | <i>spoIID/630Δerm</i> |
|---------------|--------------|-----------------------|-----------------------|
|               |              | 15 h of growth        | 24 h of growth        |
| <i>CD1230</i> | <i>sigK</i>  | 0.04                  | 0.0004                |
| <i>CD1231</i> |              | NR                    | NR                    |
| <i>CD1613</i> | <i>cotA</i>  | NR                    | 0.0003                |
| <i>CD0598</i> | <i>cotCB</i> |                       | 3 x 10 <sup>-4</sup>  |
| <i>CD1433</i> | <i>cotE</i>  |                       | 0.0006                |
| <i>CD2401</i> | <i>cotD</i>  |                       | 8 x 10 <sup>-4</sup>  |
| <i>CD0551</i> | <i>sleC</i>  |                       | 0.0004                |
| <i>CD0332</i> | <i>bclA1</i> |                       | 0.01                  |
| <i>CD3230</i> | <i>bclA2</i> |                       | 0.03                  |
| <i>CD3349</i> | <i>bclA3</i> | 0.07                  | 0.0005                |
| <i>CD3580</i> |              |                       | 0.03                  |
| <i>CD1067</i> |              | 0.0003                | 0.0003                |
| <i>CD1133</i> |              |                       | 0.03                  |

**Control by SpoVT**

|               |               | <i>spoVT/630Δerm</i> |
|---------------|---------------|----------------------|
|               |               | 15 h of growth       |
| <i>CD2470</i> | <i>gpr</i>    | 9                    |
| <i>CD3564</i> | <i>spoIIR</i> | 4                    |
|               |               | 20 h of growth       |
| <i>CD2688</i> | <i>sspA</i>   | 0.014                |
| <i>CD3249</i> | <i>sspB</i>   | 0.08                 |

**Control by SpoIIR**

|               |                 | <i>spoIIR/630Δerm</i> |
|---------------|-----------------|-----------------------|
|               |                 | 14 h of growth        |
| <i>CD1192</i> | <i>spoIIIAA</i> | 0.1                   |
| <i>CD2629</i> | <i>spoIVA</i>   | 0.12                  |
| <i>CD0126</i> | <i>spoIID</i>   | 0.06                  |
| <i>CD1230</i> | <i>sigK</i>     | 0.04                  |

Cells of the 630Δerm strain and of the *spoIID* mutant were harvested after 15h or 24h of growth in SM medium. Cells of the 630Δerm strain and of the *spoVT* mutant were harvested after 15 h or 20 h of growth in SM medium. Cells of the 630Δerm strain and of the *spoIIR* mutant were harvested after 14 h of growth in SM medium. qRT-PCR experiments were performed on two different RNA preparations. The results presented corresponded to the mean of at least two independent experiments.
