# Supplementary material for: Genome-Wide Analysis of Cell Type-Specific Gene Transcription during Spore Formation in Clostridium difficile
Source: PubMed Central journal article supplement (PMC3789822; doi:10.1371/journal.pgen.1003756), 2013-10-03
Supplement: pgen.1003756.s016.pdf [file pgen.1003756.s016.pdf]

**Table S12. List of oligonucleotides**

| <b>Description</b> | <b>SEQUENCE (5' TO 3')</b> | <b>Primers</b> |
|--------------------|----------------------------|----------------|
| 5' CD0125-spoIIQ   | GCAGTAGGTGGAGTTTGGTTT      | LS156b         |
| 3' CD0125          | TGAATCCGTTGCAGTAGGG        | LS157          |
| 5' CD0126-spoIIID  | GGGCCATAGTGGTAGCAAAA       | LS102          |
| 3' CD0126          | TGGCAAGGGATGGATTTATT       | LS103          |
| 5' CD0332-bclA1    | GCGGAGGAGTACTTTCTGGA       | LS206          |
| 3' CD0332          | GCTGATTGCCCATTTTCGTAT      | LS207          |
| 5' CD0551-sleC     | CCAATGTCTTGACCAAATGA       | LS147          |
| 3' CD0551          | CTGCCCAGAAGAACCAACTT       | LS148          |
| 5' CD0598-cotCB    | TTAAGGCTGCTGGACTTGGT       | LS158          |
| 3' CD0598          | AGTTACCGAATCGCCAAAGA       | LS159          |
| 5' CD0684          | AATCCAGCTCCTGTCTTTGC       | LS218          |
| 3' CD0684          | CGTCTAATCCAGCAACGTCTC      | LS219          |
| 5' CD3499-spoVT    | TTGGAAGGGTAGTTATCCCAA      | IMV550         |
| 3' CD3499          | GCATATTCTTGCGAAAATTCA      | IMV551         |
| 5' CD1067          | AGCATCACCAAATCCAATCC       | LS151          |
| 3' CD1067          | AACTTGGCTTTCCACTTCCA       | LS152          |
| 5' CD1133          | TTGATATGGCCACAAAGAA        | LS166          |
| 3' CD1133          | CACTTCTTGATATGCACACTTTTT   | LS167          |
| 5' CD1192-spoIIIAA | CACCACCTCAATGTGGAAAA       | LS100          |
| 3' CD1192          | GCTCCTGCTATCTCATTACGC      | LS101          |
| 5' CD1230-sigK     | GAAAAACCCTTAACCCCTGA       | LS155          |
| 3' CD1230          | TCATCCTGATCTTCCGTTGA       | LS156          |
| 5' CD1430          | TTCAAAAAGCCATCCATCAA       | LS214          |
| 3' CD1430          | TCGCTAAATTTACCCATTGGA      | LS215          |
| 5' CD1433-cotE     | CAGGCCCAAATGGTAGAAAA       | LS143          |
| 3' CD1433          | GAAGGCATTCCAGCATTCTC       | LS144          |
| 5' CD2470-gpr      | TGCATTGGCTTCAAGAAAAA       | LS114          |
| 3' CD2470          | GCAATAACATCCACGCCTAAA      | LS115          |
| 5' CD1486          | TAATCGCTGAAGGGGAAAGA       | LS220          |
| 3' CD1486          | CCAACATCTTCAGTTCCATGA      | LS221          |
| 5' CD1511-cotB     | TTGCTATGGAAGCTGACCACT      | LS141          |
| 3' CD1511          | TTGTTCTGCAACTGATGTGAGA     | LS142          |
| 5' CD1613-cotA     | GCTGCATCTACTCCATTAGCAA     | LS145          |
| 3' CD1613          | GCAATCATCACAAATCGCAGT      | LS146          |
| 5' CD1940          | GGATTTTTGGGAATAATTTCAAG    | LS232          |
| 3' CD1940          | TTTTGTCTGGATGTTTCTGGA      | LS233          |
| 5' CD2000          | GGCAAGAGAGGAGTTTGAA        | LS226          |
| 3' CD2000          | TCCATTTCTTGTTCCGTTT        | LS227          |
| 5' CD2375          | AAAGTAGATGGAATGCAAGCAA     | LS212          |
| 3' CD2375          | CATTTTACAGCTTCACAATGAATG   | LS213          |
| 5' CD2401-cotD     | AAAGCTGCAGGTCTTGGTTC       | LS160          |
| 3' CD2401          | AAATCGGTTACGGGATTTGA       | LS161          |
| 5' CD2629-spoIVA   | CCCCAAAGTGGTTCAGGTAA       | LS106          |
| 3' CD2629          | TGCCCTAAAGCTCCTTCAAC       | LS107          |
| 5' CD2688-sspA     | CCAGGAGCAAAGAGGCTTTA       | IMV552         |
| 3' CD2688          | TCCAGCCATTTGTTGTTTTCAG     | IMV553         |

|                           |                                          |        |
|---------------------------|------------------------------------------|--------|
| 5' CD3230-bclA2           | AGCAGCAAACAATGCACAAT                     | LS208  |
| 3' CD3230                 | TCCCTCCAAGTGAAGATTT                      | LS209  |
| 5' CD3249-sspB            | CAGTAGTTCCAGAAGCAAAAGC                   | IMV554 |
| 3' CD3249                 | TTCCAGCCATTTGTCTTTCA                     | IMV555 |
| 5' CD0773-spoVAC          | AGGTGCTAGTTCTGCAACATCA                   | LS216  |
| 3' CD0773                 | ACCAGCTCCAGCTCTTTTTTC                    | LS217  |
| 5' CD3564-spoIIR          | GTTCTTCCAGCTGGTGAATATAAA                 | LS112  |
| 3' CD3564                 | CAACAAAACATAGTGGAGGGAAC                  | LS113  |
| 5' CD3551.1               | AACTGGGGTGCAATTGGTAT                     | LS230  |
| 3' CD3551.1               | TCCAGCTAAACCTACAATGAAGT                  | LS231  |
| 5' CD3580                 | CGTTGACGAAATAGCACCTG                     | LS164  |
| 3' CD3580                 | TGGGGAAATACAATAGAAGCGTA                  | LS165  |
| 5' CD1213-spoIVB          | GGTCATGCCATAAAAGATTTCG                   | LS200  |
| 3' CD1213                 | CCCATTAAATTGCTGTCTATTAATA                | LS201  |
| 5' CD2636                 | CAAACAATACCCATCAAGACCA                   | LS245  |
| 3' CD2636                 | GTCAAGGCTGCAAACTCCTT                     | LS246  |
| 5' CD0792                 | TTTGGGGTTTTAGGAGCTGT                     | LS243  |
| 3' CD0792                 | GGCTTTTTATCGGATTTTGC                     | LS244  |
| 5' CD1290                 | TGGATGATGTTTCAAGACAAAA                   | LS239  |
| 3' CD1290                 | AAACACCTTTATTAGACGCATTTTC                | LS240  |
| 5' CD0311                 | TTCCCAAGATGAATTGAGAA                     | LS257  |
| 3' CD0311                 | TGTTAGGCAAGTTGTTTGGAGA                   | LS258  |
| 5' CD1616                 | TGGCAAAGAGTTGGGTATG                      | IMV617 |
| 3' CD1616                 | CTTCAATTGGCATTGGCTTT                     | IMV618 |
| 5' CD1746                 | AGGGCTTATGTGTGGAAATG                     | LS247  |
| 3' CD1746                 | TAATCCAACCCCAACTGCTC                     | LS248  |
| 5' CD3521                 | GGTGGTTCTCCAGGTGAAAT                     | LS259  |
| 3' CD3521                 | CCAGCTTCAGGTTCAAGACC                     | LS260  |
| 5' CD0596                 | TGGGATATTTAAAAGAGGATAAACAA               | LS261  |
| 3' CD0596                 | TGCTGTTTTTGGATTGTATGTG                   | LS262  |
| 5' CD0580-gapN            | GTATGGGCTGAAATGCCTGT                     | LS241  |
| 3' CD0580                 | CTTCTGCCCTTGCAGATTTT                     | LS242  |
| 5' CD2856                 | AAACAAGGGCATTTCAGAAG                     | LS255  |
| 3' CD2856                 | TGCAAATATATTATTGGGGTCAA                  | LS256  |
| 5' CD0783-spoIVB'         | GCTTTTAGCTCAAACGGTGGT                    | LS249  |
| 3' CD0783                 | CCTACAGCTGGGTCGTTTTTC                    | LS250  |
| 5' CD1229                 | GCAGCAATAATCTCGGAAGC                     | LS253  |
| 3' CD1229                 | CCTGGTGGATATGTCGCTTT                     | LS254  |
| IBS- <i>spoIIR</i> -39a   | AAAAAAGCTTATAATTATCCTTAGATATCAGACTTGTGC  | CT025  |
|                           | GCCCAGATAGGGTG                           |        |
| EBS1d- <i>spoIIR</i> -39a | CAGATTGTACAAATGTGGTGATAACAGATAAGTCAGACT  | CT026  |
|                           | TAATAACTTACCTTTCTTTGT                    |        |
| EBS2- <i>spoIIR</i> -39a  | TGAACGCAAGTTTCTAATTTTCGATTATATCTCGATAGAG | CT027  |
|                           | GAAAGTGTCT                               |        |
| IBS- <i>spoIIID</i> -39s  | AAAAAAGCTTATAATTATCCTTAATAGTCGTAGCAGTGC  | LS171  |
|                           | GCCCAGATAGGGTG                           |        |
| EBS1d- <i>spoIIID</i> -   | CAGATTGTACAAATGTGGTGATAACAGATAAGTCGTAGC  | LS172  |
|                           | AAATAACTTACCTTTCTTTGT                    |        |

|                                        |                                                                  |                                  |
|----------------------------------------|------------------------------------------------------------------|----------------------------------|
| EBS2- <i>spoIID</i> -39s               | TGAACGCAAGTTTCTAATTTTCGGTACTATCCGATAGAG<br>GAAAGTGTCT            | LS173                            |
| 5' CD0126- <i>spoIID</i>               | ATCTCATATAGAGGAAAGG                                              | LS184                            |
| IBS- <i>spoVT</i> -157a                | AAAAAAGCTTATAATTATCCTTACATTTTCATTCACGTGC<br>GCCCAGATAGGGTG       | LS174                            |
| EBS1d- <i>spoVT</i> -<br>157a          | CAGATTGTACAAATGTGGTGATAACAGATAAGTCATTCA<br>CCTTAACTTACCTTTCTTTGT | LS175                            |
| EBS2- <i>spoVT</i> -157a               | TGAACGCAAGTTTCTAATTTTCGGTTAAATGTCGATAGAG<br>GAAAGTGTCT           | LS176                            |
| 3' CD0126- <i>spoIID</i>               | CATTTTTTAACTTCTTTGGC                                             | LS185                            |
| 5' CD3499- <i>spoVT</i>                | TTCACAGCAAAAGATGGAG                                              | LS186                            |
| 3' CD3499- <i>spoVT</i>                | ACACTCCATATCCTAGTAC                                              | LS187                            |
| 3'BamHI- <i>spoIIR</i>                 | <u>CGGGATCCT</u> TAAATATTTTCTGTTGGTTC                            | IMV641                           |
| 5'XhoI- <i>spoIIR</i>                  | <u>CCGCTCGAGATA</u> AGGCTATGATTAGT                               | IMV642                           |
| 5'XhoI- <i>spoVT</i>                   | <u>CCGCTCGAGGT</u> AGAAAAAGATGAAAAAG                             | IMV644                           |
| 3'BamHI- <i>spoVT</i>                  | <u>CGGGATCCT</u> TACGATTACACCTGCTA                               | IMV648                           |
| 5'XhoI- <i>spoIID</i>                  | <u>CCGCTCGAGCAAT</u> GAGTCTAATTAAGT                              | IMV647                           |
| 3'BamHI- <i>spoIID</i>                 | <u>CGGGATCCA</u> AATCTCGCTTTAATCAA                               | LS283                            |
| 5' CD3564- <i>spoIIR</i>               | AAATTAAGATTAGATTGGGACTA                                          | IMV649                           |
| Sequencing<br>pMTL007                  | TTAAGGAGGTGTATTTTCATATGACCATGATTACG                              | pMTL007 Fw                       |
| Sequencing<br>pMTL007                  | AGGGTATCCCCAGTTAGTGTTAAGTCTTGG                                   | pMTL007 Rev                      |
| 5'-promoter<br><i>spoIIR</i> -EcoRI Fw | AAGCACTTT <u>GAATTC</u> CGATGTAGATGCGTT                          | P <i>spoIIR</i> -SNAP<br>EcoRIFw |
| 3'-promoter<br><i>spoIIR</i> -XhoI Rev | ATTGAAA <u>ACTCGAGCT</u> CAAGATAAATTTATATC                       | P <i>spoIIR</i> -SNAP<br>XhoIRev |
| 5'-sigF-NcoI                           | GAGCTCCATGGGAGGTTTTATTAATGGAAGTAACTG                             | sigF-pet28a Fw                   |
| 3'-sigF-XhoI                           | TGCCTCGAGCGATATATATTTCTTTTAACTTAG                                | sigF-pet28a<br>Rev               |
| 5'-sigE-NcoI                           | GAGCTCCATGGGCTTTATTACTATGTTAGGTATTA                              | sigE-pet28a Fw                   |
| 3'-sigE-XhoI                           | TGCCTCGAGTACAAATTTTTTCATTTCTTTTTGC                               | sigE-pet28a<br>Rev               |
| Intron probe                           | ATCTGTAGGAGAACCTATGGGAAC                                         | OBD522                           |
| Intron probe                           | CACGTAATAAATATCTGGACGTAAAA                                       | OBD523                           |

---

<sup>A</sup> RESTRICTION SITES UNDERLINED
